# Supplementary material for: Effects of priming intermittent theta burst stimulation on upper limb motor recovery after stroke: study protocol for a proof-of-concept randomised controlled trial
Source: PubMed Central journal article supplement — BMJ Open. 2020 Mar 8;10(3):e035348. doi: 10.1136/bmjopen-2019-035348 (PMC7064082; doi:10.1136/bmjopen-2019-035348), 2020-03-08
Supplement: bmjopen-2019-035348.draft_revisions.pdf [file bmjopen-2019-035348.draft_revisions.pdf]

# BMJ Open

BMJ Open is committed to open peer review. As part of this commitment we make the peer review history of every article we publish publicly available.

When an article is published we post the peer reviewers' comments and the authors' responses online. We also post the versions of the paper that were used during peer review. These are the versions that the peer review comments apply to.

The versions of the paper that follow are the versions that were submitted during the peer review process. They are not the versions of record or the final published versions. They should not be cited or distributed as the published version of this manuscript.

BMJ Open is an open access journal and the full, final, typeset and author-corrected version of record of the manuscript is available on our site with no access controls, subscription charges or pay-per-view fees (<http://bmjopen.bmj.com>).

If you have any questions on BMJ Open's open peer review process please email [info.bmjopen@bmj.com](mailto:info.bmjopen@bmj.com)

# BMJ Open

## The Effects of Priming Intermittent Theta Burst Stimulation on Upper Limb Motor Recovery After Stroke: Study Protocol for a Randomized Controlled Trial

|                               |                                                                                                                                                                                |
|-------------------------------|--------------------------------------------------------------------------------------------------------------------------------------------------------------------------------|
| Journal:                      | <i>BMJ Open</i>                                                                                                                                                                |
| Manuscript ID                 | bmjopen-2019-035348                                                                                                                                                            |
| Article Type:                 | Protocol                                                                                                                                                                       |
| Date Submitted by the Author: | 31-Oct-2019                                                                                                                                                                    |
| Complete List of Authors:     | ZHANG, Jack; Hong Kong Polytechnic University Faculty of Health and Social Sciences, Department of Rehabilitation Sciences<br>Fong, Kenneth; Hong Kong Polytechnic University, |
| Keywords:                     | Stroke < NEUROLOGY, REHABILITATION MEDICINE, NEUROLOGY                                                                                                                         |
|                               |                                                                                                                                                                                |

SCHOLARONE™  
Manuscripts

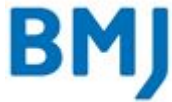

I, the Submitting Author has the right to grant and does grant on behalf of all authors of the Work (as defined in the below author licence), an exclusive licence and/or a non-exclusive licence for contributions from authors who are: i) UK Crown employees; ii) where BMJ has agreed a CC-BY licence shall apply, and/or iii) in accordance with the terms applicable for US Federal Government officers or employees acting as part of their official duties; on a worldwide, perpetual, irrevocable, royalty-free basis to BMJ Publishing Group Ltd ("BMJ") its licensees and where the relevant Journal is co-owned by BMJ to the co-owners of the Journal, to publish the Work in this journal and any other BMJ products and to exploit all rights, as set out in our [licence](#).

The Submitting Author accepts and understands that any supply made under these terms is made by BMJ to the Submitting Author unless you are acting as an employee on behalf of your employer or a postgraduate student of an affiliated institution which is paying any applicable article publishing charge ("APC") for Open Access articles. Where the Submitting Author wishes to make the Work available on an Open Access basis (and intends to pay the relevant APC), the terms of reuse of such Open Access shall be governed by a Creative Commons licence – details of these licences and which [Creative Commons](#) licence will apply to this Work are set out in our licence referred to above.

Other than as permitted in any relevant BMJ Author's Self Archiving Policies, I confirm this Work has not been accepted for publication elsewhere, is not being considered for publication elsewhere and does not duplicate material already published. I confirm all authors consent to publication of this Work and authorise the granting of this licence.

Manuscript submitted to *BMJ Open*

**The Effects of Priming Intermittent Theta Burst Stimulation  
on Upper Limb Motor Recovery After Stroke: Study  
Protocol for a Randomized Controlled Trial**

Jack Jiaqi ZHANG and Kenneth Nai Kuen FONG

Department of Rehabilitation Sciences, The Hong Kong Polytechnic University,

Kowloon, Hong Kong SAR, China

\*Correspondence to:

Jack Jiaqi ZHANG

Department of Rehabilitation Sciences,

The Hong Kong Polytechnic University,

Kowloon, Hong Kong SAR, China

E-mail: 17902718r@connect.polyu.hk

Telephone: +852 2766 4283

### ***Abstract***

**Introduction:** Intermittent Theta Burst Stimulation (iTBS), a form of repetitive Transcranial Magnetic Stimulation (rTMS), delivered to the ipsilesional primary motor cortex (M1), appears to enhance the brain's response to rehabilitative training in patients with stroke. However, its clinical utility is highly subject to variability in different protocols. New evidence has reported that, preceding iTBS, with continuous theta burst stimulation (cTBS) may stabilize and even boost the facilitatory effect of iTBS on the stimulated M1, via metaplasticity. The aim of this study is to investigate the effects of iTBS primed with cTBS (i.e., priming iTBS), in addition to robot-assisted training (RAT), on the improvement of the hemiparetic upper limb functions of stroke patients, and to explore potential sensorimotor neuroplasticity using electroencephalography (EEG).

**Methods and analysis:** A three-arm randomized controlled trial (RCT) will be performed, with an estimated total of 36 patients with chronic stroke. All participants will be randomly allocated to receive 10 sessions of rTMS with different TBS protocols (cTBS+iTBS, sham cTBS+iTBS, and sham cTBS+sham iTBS), three to five sessions per week, for two to three weeks. All participants will receive 60 minutes of RAT after each stimulation session. Primary outcomes will be assessed using Fugl-Meyer Assessment – Upper Extremity scores and Action Research Arm Test. Secondary outcomes will be assessed using kinematic outcomes generated during RAT, and EEG.

1  
2  
3  
4 **Ethics and dissemination:** Ethical approval has been obtained from The Human  
5  
6  
7 Subjects Ethics Sub-committee, University Research Committee of The Hong Kong  
8  
9  
10 Polytechnic University (Reference number: HSEARS20190718003). The results  
11  
12  
13 yielded from this study will be presented at international conferences and sent to a peer-  
14  
15  
16 review journal to be considered for publication.

17  
18  
19 (268 words)

20  
21  
22 **Trial registration number:** NCT04034069.

23  
24  
25 **Keywords:** Theta burst stimulation; stroke; hemiparetic upper limb; priming;  
26  
27  
28 metaplasticity.  
29  
30  
31  
32  
33  
34  
35  
36  
37  
38  
39  
40  
41  
42  
43  
44  
45  
46  
47  
48  
49  
50  
51  
52  
53  
54  
55  
56  
57  
58  
59  
60

## Article Summary

### - Strengths and limitations of this study

- The present study is the first randomized controlled trial to explore the effects of priming iTBS in regard to facilitating hemiparetic upper limb recovery in patients with stroke.
- This study investigates sensorimotor plasticity, along with the improvement of upper limb functions, in association with priming iTBS.
- The study attempts to potentiate the response to iTBS via an inhibitory priming session and thereby improve its clinical utility in stroke rehabilitation.
- The results of this study will contribute to the optimal use of TBS in poststroke upper limb rehabilitation.
- The present study restricts the experimental sample to chronic stroke patients residing in community-dwellings. Future studies with larger stroke cohorts or at the acute phase should be conducted.

## Introduction

Repetitive transcranial magnetic stimulation (rTMS) has been extensively investigated as an add-on form of therapy for stroke rehabilitation.<sup>1</sup> rTMS is usually limited to frequencies of 20 Hz or less, due to safety concerns, in human studies.<sup>2</sup> However, in animal studies, effects on synaptic plasticity are usually induced by repeated short bursts of high-frequency (> 50 Hz) stimulation, given at a frequency from 3 to 5 Hz and known as theta burst stimulation (TBS).<sup>3</sup> Huang *et al.* were the first to investigate the neurophysiological effects of TBS, delivered via a magnetic stimulator, in the human primary motor cortex (M1), and demonstrated that 600-pulse intermittent theta burst stimulation (iTBS) enhanced corticomotor excitability in healthy human subjects, whereas 600-pulse continuous theta burst stimulation (cTBS) did the opposite.<sup>4</sup> Serial TBS sessions delivered at a relatively low intensity were subsequently investigated in stroke survivors and safety concerns regarding TBS in this population appear to be minor and rare.<sup>5-8</sup> Various experiments with humans have also demonstrated that TBS is able to induce neuroplastic changes of the stimulated M1 in a relatively short conditioning period (i.e., 40 seconds for standard 600-pulse cTBS and three minutes for standard 600-pulse iTBS),<sup>9</sup> thus reducing the time spent receiving treatment.

A substantial number of clinical trials with stroke patients have revealed that iTBS of



1  
2  
3  
4 the ipsilesional M1 significantly improves hemiplegic arm<sup>5 8 10-12</sup> and hand<sup>6</sup> motor  
5  
6  
7 functions, compared to sham stimulations. Similar effects have also been observed in  
8  
9  
10 studies using cTBS of the contralesional M1.<sup>13 14</sup> However, some trials have not shown  
11  
12  
13 any additional benefits on upper limb motor outcomes from iTBS or cTBS in stroke  
14  
15  
16 survivors, in contrast to sham TBS.<sup>7 15</sup> A recent meta-analysis showed that a pooled  
17  
18  
19 standardized effect size of iTBS was 0.60, while that of cTBS was 0.35 for upper limb  
20  
21  
22 motor outcomes in patients with stroke,<sup>16</sup> indicating that the increment of the  
23  
24  
25 excitability of the affected M1 through iTBS is critical for improving the brain's  
26  
27  
28 response to motor training in patients with stroke. However, substantial response  
29  
30  
31 variability regarding iTBS among humans may contribute to the use of different  
32  
33  
34 protocols among current studies,<sup>17 18</sup> which limits their clinical utility.

35  
36  
37  
38  
39  
40 It has been shown that the history of neuronal activities is one of the major factors that  
41  
42  
43 could influence the brain's response to TBS.<sup>19</sup> Synaptic plasticity is regulated by  
44  
45  
46 previous neuronal activities via metaplasticity. Metaplasticity is a neuroprotective  
47  
48  
49 mechanism that modulates the threshold of synaptic plasticity to ensure that the neural  
50  
51  
52 system cannot be predominated by long-term potentiation (LTP) or long-term  
53  
54  
55 depression (LTD).<sup>20</sup> Excitatory rTMS over the M1 may be unable to facilitate  
56  
57  
58 corticomotor excitability when the neuronal activities have already been elevated  
59  
60

1  
2  
3  
4 before stimulation, which is likely happening when patients with stroke receive  
5  
6  
7 extensive training before non-invasive brain stimulation.  
8  
9

10  
11  
12  
13 Considering the mechanism of metaplasticity, several priming stimulation protocols,  
14  
15  
16 designed to incorporate a priming session followed by a stimulation session, have been  
17  
18  
19 investigated with healthy individuals.<sup>21</sup> An inhibitory priming stimulation via cTBS  
20  
21  
22 may ensure or even boost the facilitatory effect of subsequent excitatory stimulation  
23  
24  
25 sessions via iTBS. In healthy individuals, this priming protocol seems to amplify the  
26  
27  
28 facilitatory effect of excitatory stimulation, compared with iTBS alone, as reflected by  
29  
30  
31 the increased amplitude of motor evoked potential (MEP).<sup>22-24</sup> To the best of our  
32  
33  
34 knowledge, no study has investigated the effects of priming iTBS protocols in patients  
35  
36  
37 with stroke to date.  
38  
39  
40  
41  
42

43 Various neurological biomarkers of stroke motor recovery have been proposed.<sup>25</sup>  
44  
45  
46 Electroencephalography (EEG), a non-invasive measure of cortical neuronal oscillation,  
47  
48  
49 is of great interest, because it is a relatively convenient and well-tolerated brain imaging  
50  
51  
52 technique for patients with stroke. Sensorimotor event-related desynchronization  
53  
54  
55 (ERD), a neurophysiological marker of sensorimotor activation, could be induced  
56  
57  
58 through either action observation or action execution.<sup>26</sup> Previously, attention has been  
59  
60

1  
2  
3  
4 paid to movement-related sensorimotor ERD, which has been shown to be correlated  
5  
6  
7 with the severity of hemiplegia in patients with stroke.<sup>27 28</sup> Subsequently, researchers  
8  
9  
10 began to investigate sensorimotor ERD induced by observing mirror visual feedback  
11  
12  
13 (MVF) in healthy adults and patients with stroke.<sup>29 30</sup> A pilot study has demonstrated  
14  
15  
16 that multiple sessions of iTBS appear to enhance MVF-induced sensorimotor ERD in  
17  
18  
19 healthy adults.<sup>31</sup> So far, MVF-induced sensorimotor ERD has not been used as an  
20  
21  
22 outcome of neuroplasticity in any clinical stroke trial in order to examine its potential  
23  
24  
25 as a biomarker for stroke motor recovery.  
26  
27  
28  
29  
30

31 Therefore, our study has two objectives: First, we investigate the effects of 10 sessions  
32  
33  
34 of rTMS using different TBS protocols (i.e., cTBS plus iTBS, sham cTBS plus iTBS,  
35  
36  
37 and sham cTBS plus sham iTBS), in addition to standard robot-assisted training (RAT)  
38  
39  
40 for both the proximal and distal joints of the hemiparetic upper limb, delivered across  
41  
42  
43 three to five sessions per week for two to three weeks, on improving the hemiparetic  
44  
45  
46 upper limb functions of stroke survivors. Fugl-Meyer Assessment - Upper Extremity  
47  
48  
49 (FMA-UE) scores and Action Research Arm Test (ARAT) will be used as the primary  
50  
51  
52 outcome measures. Safety profiles will be systematically collected during each session  
53  
54  
55 of the intervention, using a standard questionnaire. Second, we investigate the effects  
56  
57  
58 of different TBS protocols, cTBS plus iTBS, sham cTBS plus iTBS, and sham cTBS  
59  
60

1  
2  
3  
4 plus sham iTBS, in addition to RAT, on upper limb kinematic outcomes yielded from  
5  
6  
7 each RAT session, and sensorimotor ERD induced by hemiparetic hand movement and  
8  
9  
10 observation of the MVF of nonparetic hand movement, in patients with stroke.  
11  
12  
13  
14  
15

## 16 **Methods**

17  
18  
19 This study protocol has been written according to the Standard Protocol Items for  
20  
21  
22 Randomized Trials statement.<sup>32</sup>  
23  
24  
25  
26  
27

## 28 **Study design**

29  
30  
31 This study is designed as a three-arm, parallel group, sham-controlled RCT. Potential  
32  
33  
34 participants with stroke will be recruited through convenience sampling from self-  
35  
36  
37 support groups in the community in Hong Kong. The study will be conducted in a local  
38  
39  
40 university laboratory.  
41  
42  
43  
44  
45

## 46 **Inclusion and exclusion criteria**

47  
48  
49 Participants must meet all of the following criteria: (1) have a diagnosis of a unilateral  
50  
51  
52 ischemic or hemorrhagic first-ever stroke; (2) with stroke onset of one year to six years  
53  
54  
55 before the study; (3) between 18 and 75 years old; (4) reside in community dwellings;  
56  
57  
58 (4) with residual upper limb impairment  $\geq$  second level in the Functional Test for the  
59  
60

1  
2  
3  
4 Hemiplegic Upper Extremity (FTHUE).<sup>33</sup> FTHUE levels two to four are defined as low  
5  
6  
7 upper limb functioning poststroke, and levels five and seven are defined as high upper  
8  
9  
10 limb functioning poststroke; (5) able to understand simple verbal instruction and follow  
11  
12  
13 one-step commands; and (6) able to give informed written consent to participate in the  
14  
15  
16 study.

17  
18  
19  
20  
21  
22 Although TBS is often regarded as safe for certain subjects, the greatest acute risk of  
23  
24  
25 TMS is the rare occurrence of induced seizures. Besides seizures, other risks include  
26  
27  
28 minor pain, such as a headache or local discomfort, minor cognitive changes, and  
29  
30  
31 psychiatric symptoms. In this study, patients who meet any of the following rTMS  
32  
33  
34 contraindications will not be included: (1) unstable medical condition; (2) history of  
35  
36  
37 epileptic seizures, unconsciousness, or intracranial hypertension; (3) serious heart  
38  
39  
40 disease; (4) pregnant; (5) significant aphasia or difficulty understanding the instructions  
41  
42  
43 given by the investigators; (6) with metal implants *in vivo*, such as a pacemaker,  
44  
45  
46 artificial cochlear, or implant brain stimulator; (7) history of receiving a craniotomy; or  
47  
48  
49 (8) does not consent to TBS intervention.<sup>2</sup> To ensure safety, the participants will be  
50  
51  
52 under the supervision of at least one investigator who has completed training in TMS.  
53  
54  
55 All participants will undergo a safety screening for the potential risks of TMS to ensure  
56  
57  
58 they are eligible to participate in this study.  
59  
60

1  
2  
3  
4  
5  
6  
7 In addition to TMS contraindications, participants who meet any of the following  
8  
9  
10 criteria will be also excluded: (1) previous diagnosis of any neurological disease  
11  
12  
13 excluding stroke; (2) presence of any sign of cognitive problems (Abbreviated Mental  
14  
15  
16 Test, Hong Kong Cantonese version  $< 6/10$ );<sup>34</sup> (3) patients with extreme spasticity over  
17  
18  
19 the elbow or wrist in the hemiparetic upper limb (Modified Ashworth score  $> 2$ ),<sup>35</sup> or  
20  
21  
22 severe pain that hinders upper limb movement; (4) other notable impairments of the  
23  
24  
25 upper limb not affected by stroke (e.g., a recent fracture, severe osteoarthritis,  
26  
27  
28 congenital upper limb deformity); and (5) concurrent participation in upper limb  
29  
30  
31 rehabilitation training in a hospital, university laboratory or other rehabilitation settings,  
32  
33  
34 or active participation in another clinical trial.  
35  
36  
37  
38  
39

### 40 **Sample size estimation**

41  
42  
43 Since the difference among the effects of priming iTBS in hemiparetic upper limb  
44  
45  
46 training has not been previously investigated, we have estimated the sample size based  
47  
48  
49 on current studies comparing iTBS and sham stimulation. A recent meta-analysis yields  
50  
51  
52 a pooled Cohen's  $d$  of 0.60 for a two-group design in favor of iTBS improving upper  
53  
54  
55 limb motor outcomes, in contrast to sham stimulation.<sup>16</sup> An effect size ( $d$ ) of 0.60  
56  
57  
58 corresponds approximately to an effect size ( $f$ ) of 0.30 for a study design of three-group  
59  
60

1  
2  
3  
4 comparisons. An estimate of sample size for each group in a three-group design, given  
5  
6  
7 a power of 0.80 and a two-tailed alpha error probability of 0.05, is 27 patients in total.  
8  
9

10 When considering the drop-out rate of 20%, we therefore plan to recruit 12 participants  
11  
12  
13 for each group (a total of 36) for this study.  
14  
15  
16  
17  
18

### 19 **Randomization**

20  
21  
22 Three parallel groups will be employed: (1) cTBS plus iTBS; (2) sham cTBS plus iTBS;  
23  
24  
25 and (3) sham cTBS plus sham iTBS. The collection of demographic characteristics (age,  
26  
27  
28 gender, education, side of hemiplegia, handedness, type of stroke, time from onset to  
29  
30  
31 treatment, lesion site(s)) and baseline assessments will be performed prior to  
32  
33  
34 randomization. Participants' medical information related to their stroke will be  
35  
36  
37 retrieved from the electronic clinical management system in the hospital after receiving  
38  
39  
40 consent. All participants will be randomly allocated in a 1:1:1 ratio to each group after  
41  
42  
43 the screening and baseline assessments have been carried out. A random sequence will  
44  
45  
46 be generated using Minimize software.<sup>36</sup> Participants will be pre-stratified based on  
47  
48  
49 their hemiparetic upper limb functioning (i.e., FTHUE high functioning *vs.* low  
50  
51  
52 functioning). The allocation sequence will be concealed from all investigators and  
53  
54  
55 assessors.  
56  
57  
58  
59  
60

## Intervention

### TBS session

A total of 10 sessions of TBS will be delivered using MagPro magnetic stimulators (MagVenture, Denmark) connected with a figure-of-eight coil. Resting motor threshold (RMT) is defined as the minimum stimulation intensity over the hot spot that could elicit a motor evoked potential (MEP) of no less than 50  $\mu$ v in three out of six trials over the contralesional first dorsal interosseous (FDI). The stimulation point is the hotspot mirrored over the midsagittal line (i.e., ipsilesional M1), verified and maintained by a TMS-navigation system (Localite, Bonn, Germany).

We follow the standard 600-pulse TBS protocol proposed by Huang *et al.*<sup>4</sup>: iTBS: 20 trains of 10 bursts given with eight-second intervals, with a total of 600 pulses, around 3-minute per session; cTBS: 20 trains of 10 bursts given with 0.2-second intervals, with a total of 600 pulses, around 40 seconds per session. All stimulations will be delivered over the ipsilesional M1. The intensity of the TBS will be set at 70% RMT. Sham cTBS will be delivered with the same coil, but the intensity will be reduced to 20% of the individual RMT. The interval between the priming session and the conditioning session will be 10 minutes.<sup>22 37</sup> All participants will be informed that TBS is delivered in a subthreshold intensity that cannot induce significant limb movement or somatosensory



1  
2  
3  
4 perception.  
5  
6  
7  
8  
9

### 10 **Robot-assisted training**

11  
12  
13 Participants will be required to undergo two forms of RAT for the proximal and distal  
14  
15 joints of the hemiparetic upper limb, respectively, after each TBS session. RAT will  
16  
17 commence five minutes after the completion of the TBS session.<sup>11</sup> A Fourier M2 robot  
18  
19 (Fourier Intelligence Co. Ltd., Shanghai, China) will be used for the upper limb  
20  
21 proximal joint training. The Fourier M2 robot is an end-effector robot-assisted upper  
22  
23 limb rehabilitation device, supported by tailored interactive television games in the  
24  
25 device. A HandyRehab hand robot (Zunosaki Company Limited., Hong Kong SAR,  
26  
27 China) will be used for upper limb distal joint training. The device provides power-  
28  
29 driven extension and grasping force to the fingers and thumb in order to assist the  
30  
31 patient with opening and closing the paretic hand by means of surface  
32  
33 electromyography (EMG) triggered from the signals through the forearm extensors and  
34  
35 flexors. Active and passive modes are available in both robots. Whenever patients are  
36  
37 unable to use the active modes due to the severity of the upper limb hemiplegia, passive  
38  
39 modes will be used.  
40  
41  
42  
43  
44  
45  
46  
47  
48  
49  
50  
51  
52  
53  
54  
55  
56  
57

### 58 **Proximal joint training**

59  
60

1  
2  
3  
4 The Fourier M2 robot targets (1) flexion and extension of the shoulder joint; (2) flexion  
5  
6  
7 and extension of the elbow; (3) internal and external rotation of the shoulder joint; and  
8  
9  
10 (4) abduction and adduction of the shoulder joint. Before each training session, the size  
11  
12  
13 of the maximal active range of motion (ROM) for the hemiplegic upper limb will be  
14  
15  
16 assessed for each participant. Two-minute warm-up sessions will be delivered before  
17  
18  
19 and after each training session, in which participants will receive passive-mode RAT to  
20  
21  
22 mobilize the paretic upper limb. The movement trajectory will be predefined as a square  
23  
24  
25 and its size will be calculated based on participants' maximal active ROM. In the  
26  
27  
28 training session, the participants will be asked to move their hemiparetic upper limb to  
29  
30  
31 reach sequentially presented targets in an interactive game. Each proximal joint training  
32  
33  
34 session will last for around 30 minutes, with a break of five to 10 minutes (see Figure  
35  
36  
37 1A for a demonstration of proximal joint RAT). The assistive mode will be used to train  
38  
39  
40 the patients with limited voluntary shoulder and elbow movement (i.e., the patient  
41  
42  
43 initiates the movement and the robot then produces assistive force according to the  
44  
45  
46 subject's effort). For patients who cannot initiate movement by themselves, the passive  
47  
48  
49 mode will be used. The active mode and resistive mode will be used to train the patients  
50  
51  
52 with voluntary shoulder and elbow movement. Each participant has to sit in front of the  
53  
54  
55 robot with a computer screen attached to the device. The participant will wear a trunk-  
56  
57  
58 fixed belt to minimize compensatory movement of the trunk during training.  
59  
60

### **Distal joint training**

The HandyRehab hand robot is lightweight, powered by lithium batteries, and allows the subject to perform a full hand grasp/release movement in either the spherical grip or cylindrical grip mode. The EMG trigger threshold will be adjusted based on patients' hemiplegic arm function. Participants will be instructed to perform the different types of hand movements to pick up an object (i.e., a ball, sponge, or a cup) on a table, move it vertically and/or horizontally to four predefined targets, and release the object. The distance between the targets and participants will be adjusted based on their active ROM of proximal joints in the paretic upper limb. The EMG-triggered level will be adjusted based on patients' ability (i.e., active mode) and gradually increased as the training progresses. For patients without any detectable EMG signal from the paretic forearm, the passive mode will be used. Each distal joint training session will last for around 30 minutes, with a break of five to 10 minutes (see Figure 1B for a demonstration of distal joint RAT). In total, each RAT session lasts for approximately 60 minutes (30 minutes for proximal joints and 30 minutes for distal joints), with 10 sessions in total. An investigator with a background in occupational therapy will supervise each participant during each robot training session to ensure the correct positioning is used and that participants become familiar with the training.

## Outcome measurements

### Primary outcomes

The FMA-UE and ARAT will be used as the primary outcomes for this study.<sup>38</sup> The

FMA-UE is a clinical assessment for upper limb motor impairment after stroke. It includes 33 items assessing the movement, coordination, and reflex actions of the shoulder, elbow, forearm, and wrist, and the hand joints of the paretic arm. Each item consists of a three-point scale (zero, one, and two), with a total maximum score of 66.

The minimal clinically important difference (MCID) of the FMA-UE is 5.25 points.<sup>39</sup>

The FMA-UE will be conducted at four time points: baseline, mid-term (i.e., after five sessions), post-training (i.e., after 10 sessions), and follow-up (i.e., two weeks after the completion of all training sessions). An assessor who is unaware of the treatment allocation will carry out the assessment for each participant.

The ARAT is a clinical assessment for upper limb functional activities for patients with stroke. The ARAT assesses proximal and distal components of upper limb function. It consists of four subscales: grasp, grip, pinch, and gross movement. It has 19 movement tasks, each graded using a four-point scale (total scores range from 0 to 57). The MCID of ARAT is 5.70 points.<sup>40</sup> ARAT will be conducted at the same four time points as the

1  
2  
3  
4 FMA-UE. An assessor who is unaware of the treatment allocation will carry out the  
5  
6  
7 assessment for each participant. Assessors will be trained and tested by the principle  
8  
9  
10 investigator, before conducting clinical assessments. Upon the follow-up assessment,  
11  
12  
13 participants will be paid 100 Hong Kong dollars as the travel allowance.  
14  
15  
16  
17  
18

### 19 **Secondary outcomes**

20  
21  
22 Kinematic metrics generated during each session of RAT will be used as secondary  
23  
24  
25 outcomes for the participants' upper limb function. The following kinematic metrics  
26  
27  
28 retrieved from the M2 robot will be used as the upper limb motor outcomes in a further  
29  
30  
31 analysis: (1) the size of the maximal active ROM; (2) the mean velocity of movement  
32  
33  
34 during the training session; and (3) the movement trajectory during the training session.  
35  
36  
37 Movement trajectory will be further calculated as the hand-path ratio, which is defined  
38  
39  
40 as the real distance divided by the shortest distance between object targets.<sup>41</sup>  
41  
42  
43  
44  
45

46  
47 In order to investigate the potential neuroplasticity elicited by the training, we will  
48  
49 invite patients to participate in EEG examinations. We expect that around five patients  
50  
51  
52 from each group will voluntarily take part in the EEG examinations before and after the  
53  
54  
55 intervention. For participants who participate the EEG part, 400 Hong Kong dollars  
56  
57  
58 will be paid as an incentive. Kinematic and EEG outcomes will be assessed in a non-  
59  
60

1  
2  
3  
4 blinded manner (see Figure 2 for a flowchart).  
5  
6  
7  
8  
9

### 10 **EEG acquisition**

11

12 EEG will be captured with a 64-channel cap using a Digital DC EEG Amplifier.  
13

14  
15  
16 Electrode impedance will be kept below 10 kOhm and the signal will be sampled at  
17  
18  
19 1000 Hz. Movement-related ERD and MVF-induced ERD will be evaluated in this  
20  
21  
22 study. For movement-related ERD, participants will be asked to perform finger taps  
23  
24  
25 three times (or attempt to move their finger if they cannot perform the movement  
26  
27  
28 fluently) on a computer keyboard with the index finger of their unaffected side, in  
29  
30  
31 response to auditory cues (i.e., a 300-ms beep sound) delivered at random intervals  
32  
33  
34 (from seven seconds to 10 seconds), and to relax their hand after the completion of the  
35  
36  
37 movement.  
38  
39  
40  
41  
42

43 For MVF-induced ERD, participants will be asked to perform finger taps three times  
44  
45  
46 on a computer keyboard with the index finger of their unaffected side, in response to  
47  
48  
49 auditory cues delivered at random intervals (from seven seconds to 10 seconds),<sup>42</sup> and  
50  
51  
52 to relax their hand after the completion of the movement. A widely used EEG paradigm  
53  
54  
55 exploring the effects of MVF will be utilized in the present study;<sup>29 30 42-44</sup> movements  
56  
57  
58 will be performed under two conditions. (1) MVF of the hand movement: Participants  
59  
60

1  
2  
3  
4 will be required to perform unilateral finger tapping while viewing MVF. MVF will be  
5  
6  
7 created using a physical mirror (406 × 432 mm) placed over their midsagittal plane,  
8  
9  
10 between both arms. (2) Direct visual feedback (DVF) of the hand movement:  
11  
12  
13 Participants will be required to perform unilateral finger tapping while directly looking  
14  
15  
16 at their moving finger. The affected hand will be hidden by a non-reflective board.  
17  
18  
19  
20  
21

22 The order of conditions will be allocated randomly by drawing lots. A total of 60  
23  
24  
25 movements will be collected for each condition (affected index movement, unaffected  
26  
27  
28 index with mirror view, and unaffected index with direct view), with 180 movements  
29  
30  
31 in total.  
32  
33  
34  
35  
36

### 37 **EEG preprocessing**

38  
39  
40 Raw EEG signals will be band-pass filtered between 1 and 80 Hz and then down-  
41  
42  
43 sampled at 250 Hz. Additionally, a 50-Hz notch filter will be applied. Data will be  
44  
45  
46 offline re-referenced to bilateral mastoid electrodes. Signals with significant movement  
47  
48  
49 artifacts and long-term eye closure will be rejected during a visual inspection.  
50  
51  
52 Subsequently, EEG will be segmented in 7000 ms epochs (pre-stimulus -3000 ms and  
53  
54  
55 post-stimulus 4000 ms, with 0 as the first finger tap). Eye movement artifacts will be  
56  
57  
58 corrected using an independent component analysis algorithm.<sup>45</sup> Typical components  
59  
60

1  
2  
3  
4 reflecting the eye blinks and horizontal movements will then be rejected.  
5  
6  
7  
8  
9

### 10 **EEG time-frequency analysis**

11  
12

13 Clean epochs will be analyzed in a time-frequency domain. The event-related spectral  
14 perturbation (ERSP) method using the *newtimef* function of EEGLAB<sup>46</sup> will be used to  
15  
16 compute the ERD power. The ERD power will be baseline corrected. Subsequently, the  
17  
18 power will be averaged across all trials and converted to log power. Averaged ERD  
19  
20 powers at electrode sites C3 (ipsilesional hemisphere, IH) and C4 (contralesional  
21  
22 hemisphere, CH) will be extracted. Data from patients with right brain lesions will be  
23  
24 flipped to ensure that C3 channels stand for IHs and C4 channels stand for CHs.  
25  
26  
27  
28  
29  
30  
31  
32  
33  
34  
35  
36

37 For movement-related ERD, the power at C3 will be used for further analysis. For  
38  
39 MVF-induced ERD, the powers at IH and CH during the movement phase will be  
40  
41 extracted and an asymmetric index will be calculated with the following formula:<sup>47</sup>  
42  
43  
44  
45  
46  
47  
48

$$49 \text{ Asymmetric index} = (\text{IH ERD power}) - (\text{CH ERD power})$$

50  
51  
52  
53  
54

55 The difference of asymmetric indices under the mirror view and direct view will be  
56  
57 used to evaluate MVF-induced sensorimotor ERD<sup>42 43</sup> and used in a further analysis.  
58  
59  
60



1  
2  
3  
4  
5  
6  
7  
8  
9  
10 A more negative value indicates more activation toward the ipsilesional sensorimotor  
11 area, during the mirror view condition, compared to the direct view condition. Mu-1 (8-  
12 10 Hz), mu-2 (10-12 Hz), beta-1 (12-16 Hz), and beta-2 (16-30 Hz) will be investigated  
13 separately.  
14  
15  
16  
17  
18  
19  
20  
21  
22  
23  
24

### 25 **Safety profile investigation**

26  
27  
28 A side-effects survey will be distributed upon completion of each TBS session. See  
29  
30  
31 Figure 3 for an overview of the proposed trial.  
32  
33  
34  
35  
36

### 37 **Statistical Analysis**

38  
39  
40 Statistical analysis will be performed using SPSS version 23.0. A mixed-effects model  
41  
42 with random intercepts and slopes will be used to detect any significant differences in  
43 the rate of change in motor outcomes and sensorimotor ERD between the three groups,  
44  
45 because of its superiority in analyzing repeated measures data and dataset with missing  
46  
47 values. Group effects, time effects, and group-by-time interaction effects will be  
48  
49 included as fixed effects, and the random intercept and random slope of change in the  
50  
51 dependent variables over time will be included as random effects. Between-group  
52  
53  
54  
55  
56  
57  
58  
59  
60

1  
2  
3  
4 differences will be investigated using the interaction effects. Maximum likelihood  
5  
6  
7 estimation will be chosen as the estimation method. The covariance structure is  
8  
9  
10 assumed to be unstructured. For post-hoc comparisons, the level of significance will be  
11  
12  
13 set at  $p < 0.017$  after Bonferroni adjustment ( $0.05/3$ ;  $n = \text{number of comparisons}$ ), for  
14  
15  
16 the comparison of interaction effects. Cohen's  $d$  will be calculated to determine the  
17  
18  
19 effect size of the change scores for the behavioral motor outcomes between groups.  
20  
21  
22 Immediate training effects (data from baseline to post-training) and the durability of  
23  
24  
25 training effects (data from post-training to follow-up) will be separately investigated  
26  
27  
28 with mixed-effect models. Frequency scores for each reported side effect and the  
29  
30  
31 percentage of participants who pass the MCID of the FMA-UE and ARAT will be  
32  
33  
34 compared using Chi-squared tests between the three groups.  
35  
36  
37  
38  
39

#### 40 **Patient and public involvement**

41  
42  
43 Patients will be invited to participate in this study via advertisements. Several self-help  
44  
45  
46 stroke organizations will be notified in order to promote the enrollment. Patients will  
47  
48  
49 not be involved in participant recruitment. The results of the evaluation can be released  
50  
51  
52 to participants upon request.  
53  
54  
55  
56  
57

#### 58 **Ethics and dissemination**

1  
2  
3  
4 This randomized controlled trial was registered on 24 July 2019  
5  
6  
7 (<https://clinicaltrials.gov>, see supplementary section for trial registration data). The  
8  
9  
10 study has launched on 9th September 2019 and will continue for around a year. The  
11  
12  
13 study will be conducted in accordance with the principles of the Declaration of Helsinki.  
14  
15  
16 Written informed consent forms will be collected from each participant before the study  
17  
18  
19 begins (see a template of written consent form in supplementary section). Ethical  
20  
21  
22 consideration has been sought from the human subject ethics subcommittee of the Hong  
23  
24  
25 Kong Polytechnic University. Any modifications to this study protocol will also be  
26  
27  
28 reviewed by the subcommittee. This study will only include participants who have  
29  
30  
31 given informed written consent and the confidentiality is assured. All original data will  
32  
33  
34 be kept in strictly private. During the study, written data will be stored in a safe place;  
35  
36  
37 after the study, all data will be input to a computer by the principle investigator and a  
38  
39  
40 backup of the data will be kept on a hard drive, which will be stored in a safe place.  
41  
42  
43 The input data will be double checked by another research assistant. Personal data will  
44  
45  
46 be discarded after three years. Due to the small expected sample size of this proof-of-  
47  
48  
49 concept study, a data monitoring committee was not deemed to be required. We will  
50  
51  
52 not perform interim analyses until the completion of this study. The results of this study  
53  
54  
55 will be presented at international conferences and sent to a peer-reviewed journal to be  
56  
57  
58 considered for publication.  
59  
60

1  
2  
3  
4 (4108 words)  
5  
6  
7  
8  
9

10 **Authors' contributions:** JZ and KF were involved in the conception and design of the  
11  
12 research. JZ wrote up the first draft of the research. KF reviewed and edited the  
13  
14 manuscript. JZ and KF approved the submission of the final version of the manuscript.  
15  
16  
17

18  
19  
20  
21  
22 **Funding:** This research receives no specific grant from any funding agency in the  
23  
24 public, commercial, or not-for-profit sectors. Work of JZ was supported by PhD  
25  
26 studentships of The Hong Kong Polytechnic University.  
27  
28  
29

30  
31  
32  
33  
34 **Conflict of interests:** None declared  
35  
36  
37  
38  
39

40 **Patient consent for publication:** Not required.  
41  
42  
43  
44  
45

## 46 **References**

- 47  
48  
49 1. Pollock A, Farmer SE, Brady MC, et al. Interventions for improving upper limb  
50  
51 function after stroke. *Cochrane Database Syst Rev* 2014(11):Cd010820.  
52  
53  
54  
55 2. Rossi S, Hallett M, Rossini PM, et al. Safety, ethical considerations, and application  
56  
57  
58 guidelines for the use of transcranial magnetic stimulation in clinical practice  
59  
60

- 1  
2  
3  
4 and research. *Clin Neurophysiol* 2009;120(12):2008-39.  
5  
6  
7 3. Suppa A, Huang YZ, Funke K, et al. Ten Years of Theta Burst Stimulation in Humans:  
8  
9  
10 Established Knowledge, Unknowns and Prospects. *Brain Stimul* 2016;9(3):323-  
11  
12  
13 35.  
14  
15  
16 4. Huang YZ, Rothwell JC. The effect of short-duration bursts of high-frequency, low-  
17  
18  
19 intensity transcranial magnetic stimulation on the human motor cortex. *Clin*  
20  
21  
22 *Neurophysiol* 2004;115(5):1069-75.  
23  
24  
25 5. Hsu YF, Huang YZ, Lin YY, et al. Intermittent theta burst stimulation over  
26  
27  
28 ipsilesional primary motor cortex of subacute ischemic stroke patients: a pilot  
29  
30  
31 study. *Brain Stimul* 2013;6(2):166-74.  
32  
33  
34 6. Talelli P, Greenwood RJ, Rothwell JC. Exploring Theta Burst Stimulation as an  
35  
36  
37 intervention to improve motor recovery in chronic stroke. *Clin Neurophysiol*  
38  
39  
40 2007;118(2):333-42.  
41  
42  
43 7. Talelli P, Wallace A, Dileone M, et al. Theta burst stimulation in the rehabilitation  
44  
45  
46 of the upper limb: a semirandomized, placebo-controlled trial in chronic stroke  
47  
48  
49 patients. *Neurorehabil Neural Repair* 2012;26(8):976-87.  
50  
51  
52 8. Chen YJ, Huang YZ, Chen CY, et al. Intermittent theta burst stimulation enhances  
53  
54  
55 upper limb motor function in patients with chronic stroke: a pilot randomized  
56  
57  
58 controlled trial. *BMC Neurol* 2019;19(1):69.  
59  
60

- 1  
2  
3  
4 9. Chung SW, Hill AT, Rogasch NC, et al. Use of theta-burst stimulation in changing  
5  
6  
7 excitability of motor cortex: A systematic review and meta-analysis. *Neurosci*  
8  
9  
10 *Biobehav Rev* 2016;63:43-64.  
11  
12  
13 10. Watanabe K, Kudo Y, Sugawara E, et al. Comparative study of ipsilesional and  
14  
15  
16 contralesional repetitive transcranial magnetic stimulations for acute infarction.  
17  
18  
19 *J Neurol Sci* 2018;384:10-14.  
20  
21  
22 11. Ackerley SJ, Byblow WD, Barber PA, et al. Primed Physical Therapy Enhances  
23  
24  
25 Recovery of Upper Limb Function in Chronic Stroke Patients. *Neurorehabil*  
26  
27  
28 *Neural Repair* 2016;30(4):339-48.  
29  
30  
31 12. Sung WH, Wang CP, Chou CL, et al. Efficacy of coupling inhibitory and facilitatory  
32  
33  
34 repetitive transcranial magnetic stimulation to enhance motor recovery in  
35  
36  
37 hemiplegic stroke patients. *Stroke* 2013;44(5):1375-82.  
38  
39  
40 13. Meehan SK, Dao E, Lindsell MA, et al. Continuous theta burst stimulation over the  
41  
42  
43 contralesional sensory and motor cortex enhances motor learning post-stroke.  
44  
45  
46 *Neurosci Lett* 2011;500(1):26-30.  
47  
48  
49 14. Ackerley SJ, Stinear CM, Barber PA, et al. Combining theta burst stimulation with  
50  
51  
52 training after subcortical stroke. *Stroke* 2010;41(7):1568-72.  
53  
54  
55 15. Ackerley SJ, Stinear CM, Barber PA, et al. Priming sensorimotor cortex to enhance  
56  
57  
58 task-specific training after subcortical stroke. *Clin Neurophysiol*  
59  
60

- 1  
2  
3  
4 2014;125(7):1451-8.  
5  
6  
7 16. Zhang L, Xing G, Fan Y, et al. Short- and Long-term Effects of Repetitive  
8  
9  
10 Transcranial Magnetic Stimulation on Upper Limb Motor Function after Stroke:  
11  
12  
13 a Systematic Review and Meta-Analysis. *Clin Rehabil* 2017;31(9):1137-53.  
14  
15  
16 17. Schilberg L, Schuhmann T, Sack AT. Interindividual Variability and Intraindividual  
17  
18  
19 Reliability of Intermittent Theta Burst Stimulation-induced Neuroplasticity  
20  
21  
22 Mechanisms in the Healthy Brain. *J Cogn Neurosci* 2017;29(6):1022-32.  
23  
24  
25 18. Vernet M, Bashir S, Yoo WK, et al. Reproducibility of the effects of theta burst  
26  
27  
28 stimulation on motor cortical plasticity in healthy participants. *Clin*  
29  
30  
31 *Neurophysiol* 2014;125(2):320-6.  
32  
33  
34 19. Goldsworthy MR, Muller-Dahlhaus F, Ridding MC, et al. Inter-subject variability  
35  
36  
37 of LTD-like plasticity in human motor cortex: a matter of preceding motor  
38  
39  
40 activation. *Brain Stimul* 2014;7(6):864-70.  
41  
42  
43 20. Cassidy JM, Gillick BT, Carey JR. Priming the brain to capitalize on metaplasticity  
44  
45  
46 in stroke rehabilitation. *Phys Ther* 2014;94(1):139-50.  
47  
48  
49 21. Hassanzahraee M, Zoghi M, Jaberzadeh S. How different priming stimulations  
50  
51  
52 affect the corticospinal excitability induced by noninvasive brain stimulation  
53  
54  
55 techniques: a systematic review and meta-analysis. *Rev Neurosci* 2018  
56  
57  
58 22. Opie GM, Vosnakis E, Ridding MC, et al. Priming theta burst stimulation enhances  
59  
60

- 1  
2  
3  
4 motor cortex plasticity in young but not old adults. *Brain Stimul*  
5  
6  
7 2017;10(2):298-304.  
8  
9
- 10 23. Murakami T, Muller-Dahlhaus F, Lu MK, et al. Homeostatic metaplasticity of  
11  
12 corticospinal excitatory and intracortical inhibitory neural circuits in human  
13  
14 motor cortex. *J Physiol* 2012;590(22):5765-81.  
15  
16  
17
- 18 24. Mastroeni C, Bergmann TO, Rizzo V, et al. Brain-derived neurotrophic factor--a  
19  
20 major player in stimulation-induced homeostatic metaplasticity of human motor  
21  
22 cortex? *PLoS One* 2013;8(2):e57957.  
23  
24  
25  
26
- 27 25. Boyd LA, Hayward KS, Ward NS, et al. Biomarkers of Stroke Recovery:  
28  
29 Consensus-Based Core Recommendations from the Stroke Recovery and  
30  
31 Rehabilitation Roundtable. *Neurorehabil Neural Repair* 2017;31(10-11):864-  
32  
33  
34  
35  
36  
37 76.  
38  
39
- 40 26. Neuper C, Wörtz M, Pfurtscheller G. ERD/ERS patterns reflecting sensorimotor  
41  
42 activation and deactivation. *Event-Related Dynamics of Brain*  
43  
44 *Oscillations* 2006:211-22.  
45  
46  
47
- 48 27. Rossiter HE, Boudrias MH, Ward NS. Do movement-related beta oscillations  
49  
50 change after stroke? *J Neurophysiol* 2014;112(9):2053-8.  
51  
52  
53  
54
- 55 28. Shiner CT, Tang H, Johnson BW, et al. Cortical beta oscillations and motor  
56  
57 thresholds differ across the spectrum of post-stroke motor impairment, a  
58  
59  
60



- 1  
2  
3  
4 preliminary MEG and TMS study. *Brain Res* 2015;1629:26-37.  
5  
6  
7 29. Bartur G, Pratt H, Dickstein R, et al. Electrophysiological manifestations of mirror  
8  
9  
10 visual feedback during manual movement. *Brain Res* 2015;1606:113-24.  
11  
12  
13 30. Bartur G, Pratt H, Frenkel-Toledo S, et al. Neurophysiological Effects of Mirror  
14  
15  
16 Visual Feedback in Stroke Patients with Unilateral Hemispheric Damage. *Brain*  
17  
18  
19 *Res* 2018  
20  
21  
22 31. Zhang J, Fong K. Effects of intermittent theta burst stimulation combined with  
23  
24  
25 mirror visual feedback in healthy adults. *Brain Stimul* 2019;12(2):451.  
26  
27  
28 32. Chan AW, Tetzlaff JM, Altman DG, et al. SPIRIT 2013 statement: defining  
29  
30  
31 standard protocol items for clinical trials. *Ann Intern Med* 2013;158(3):200-7.  
32  
33  
34 33. Fong K, Ng B, Chan D, et al. Development of the Hong Kong Version of the  
35  
36  
37 Functional Test for the Hemiplegic Upper Extremity (FTHUE-HK). *Hong Kong*  
38  
39  
40 *Journal of Occupational Therapy* 2004;14(1):21-29.  
41  
42  
43 34. Chu LW, Pei CK, Ho MH, et al. Validation of the Abbreviated Mental Test (Hong  
44  
45  
46 Kong version) in the elderly medical patient. *Hong Kong Med J* 1995;1:207-11.  
47  
48  
49 35. Bohannon RW, Smith MB. Interrater reliability of a modified Ashworth scale of  
50  
51  
52 muscle spasticity. *Phys Ther* 1987;67(2):206-7.  
53  
54  
55 36. Jensen CV. A computer program for randomizing patients with near-even  
56  
57  
58 distribution of important parameters. *Comput Biomed Res* 1991;24(5):429-34.  
59  
60

- 1  
2  
3  
4 37. Iyer MB, Schleper N, Wassermann EM. Priming stimulation enhances the  
5  
6  
7 depressant effect of low-frequency repetitive transcranial magnetic stimulation.  
8  
9  
10 *J Neurosci* 2003;23(34):10867-72.  
11  
12
- 13 38. Kwakkel G, Lannin NA, Borschmann K, et al. Standardized Measurement of  
14  
15  
16 Sensorimotor Recovery in Stroke Trials: Consensus-Based Core  
17  
18  
19 Recommendations from the Stroke Recovery and Rehabilitation Roundtable.  
20  
21  
22 *Neurorehabil Neural Repair* 2017;31(9):784-92.  
23  
24
- 25 39. Page SJ, Levine P, Hade E. Psychometric properties and administration of the  
26  
27  
28 wrist/hand subscales of the Fugl-Meyer Assessment in minimally impaired  
29  
30  
31 upper extremity hemiparesis in stroke. *Arch Phys Med Rehabil*  
32  
33  
34 2012;93(12):2373-6.e5.  
35  
36
- 37 40. Van der Lee JH, De Groot V, Beckerman H, et al. The intra- and interrater reliability  
38  
39  
40 of the action research arm test: a practical test of upper extremity function in  
41  
42  
43 patients with stroke. *Arch Phys Med Rehabil* 2001;82(1):14-9.  
44  
45
- 46 41. Chan IH, Fong KN, Chan DY, et al. Effects of Arm Weight Support Training to  
47  
48  
49 Promote Recovery of Upper Limb Function for Subacute Patients after Stroke  
50  
51  
52 with Different Levels of Arm Impairments. *Biomed Res Int* 2016;2016:9346374.  
53  
54
- 55 42. Rossiter HE, Borrelli MR, Borchert RJ, et al. Cortical mechanisms of mirror therapy  
56  
57  
58 after stroke. *Neurorehabil Neural Repair* 2015;29(5):444-52.  
59  
60

- 1  
2  
3  
4 43. Lee HM, Li PC, Fan SC. Delayed mirror visual feedback presented using a novel  
5  
6  
7 mirror therapy system enhances cortical activation in healthy adults. *J Neuroeng*  
8  
9  
10 *Rehabil* 2015;12:56.  
11  
12
- 13 44. Debnath R, Franz EA. Perception of hand movement by mirror reflection evokes  
14  
15  
16 brain activation in the motor cortex contralateral to a non-moving hand. *Cortex*  
17  
18  
19 2016;81:118-25.  
20  
21
- 22 45. Delorme A, Makeig S. EEGLAB: an open source toolbox for analysis of single-  
23  
24  
25 trial EEG dynamics including independent component analysis. *J Neurosci*  
26  
27  
28 *Methods* 2004;134(1):9-21.  
29  
30
- 31 46. Makeig S. Auditory event-related dynamics of the EEG spectrum and effects of  
32  
33  
34 exposure to tones. *Electroencephalogr Clin Neurophysiol* 1993;86(4):283-93.  
35  
36
- 37 47. Fong KN, Ting KH, Chan CC, et al. Mirror therapy with bilateral arm training for  
38  
39  
40 hemiplegic upper extremity motor functions in patients with chronic stroke.  
41  
42  
43 *Hong Kong Med J* 2019;25 Suppl 3(1):30-34.  
44  
45  
46  
47  
48  
49  
50  
51  
52  
53  
54  
55  
56  
57  
58  
59  
60

## Figure Legends

Figure 1. A demonstration of RAT.

\*Note: The persons depicted are not patient and were taken with the participants knowledge.

Figure 2. Flowchart of the proposed randomized controlled trial.

Figure 3. Schedule of participant recruitment, assessments, and intervention.

Abbreviation: iTBS: intermittent theta burst stimulation; RAT: robot-assisted training;

FMA-UE: Fugl-Meyer Assessment-Upper Extremity scores; ARAT: action research arm test; EEG: electroencephalography.

1  
2  
3  
4  
5  
6  
7  
8  
9  
10  
11  
12  
13  
14  
15  
16  
17  
18  
19  
20  
21  
22  
23  
24  
25  
26  
27  
28  
29  
30  
31  
32  
33  
34  
35  
36  
37  
38  
39  
40  
41  
42  
43  
44  
45  
46  
47  
48  
49  
50  
51  
52  
53  
54  
55  
56  
57  
58  
59  
60

For peer review only

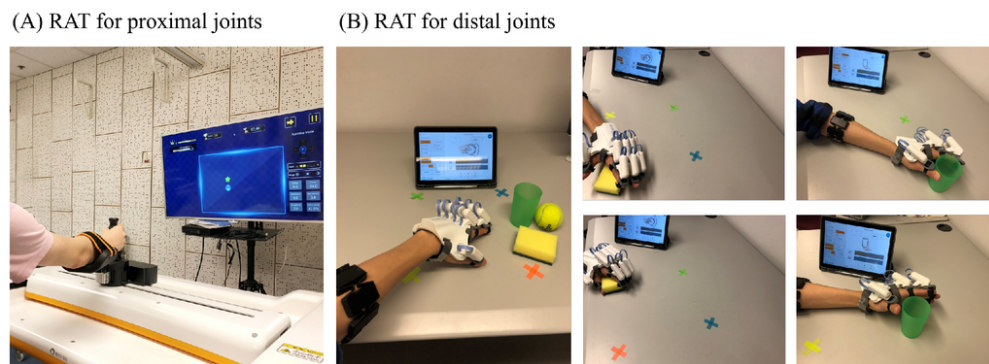

19 Figure 1. A demonstration of RAT. \*Note The persons depicted are not patient and were taken with the  
20 participants knowledge.

21 87x32mm (300 x 300 DPI)

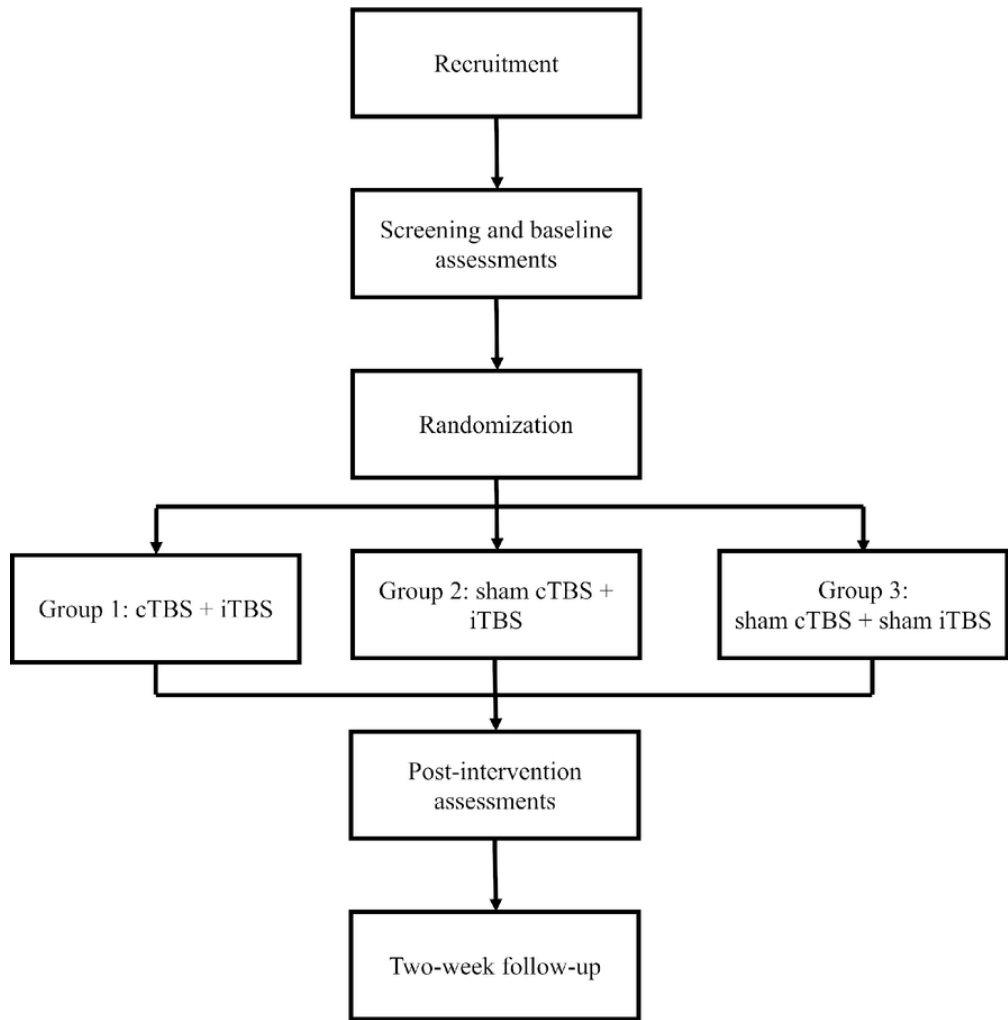

Figure 2. Flowchart of the proposed randomized controlled trial.

75x76mm (300 x 300 DPI)

| Timepoint                                        | -T1<br>(Screening) | T0<br>(Baseline) | T1<br>(Mid) | T2<br>(Post) | T3<br>(Follow-up) |
|--------------------------------------------------|--------------------|------------------|-------------|--------------|-------------------|
| Recruitment                                      | X                  |                  |             |              |                   |
| Eligibility screening                            | X                  |                  |             |              |                   |
| Informed consent                                 | X                  |                  |             |              |                   |
| <b>Randomization</b>                             |                    | X                |             |              |                   |
| <b>Intervention</b>                              |                    |                  |             |              |                   |
| Group 1: cTBS + iTBS combined with RAT           |                    | ●—————●          |             |              |                   |
| Group 2: sham cTBS + iTBS combined with RAT      |                    | ●—————●          |             |              |                   |
| Group 3: Sham cTBS + sham iTBS combined with RAT |                    | ●—————●          |             |              |                   |
| <b>Assessments</b>                               |                    |                  |             |              |                   |
| FMA-UE                                           | X                  |                  | X           | X            | X                 |
| ARAT                                             | X                  |                  | X           | X            | X                 |
| Side-effects questionnaire                       |                    | X                | X           | X            |                   |
| Kinematic outcomes                               |                    | X                | X           | X            |                   |
| EEG                                              |                    | X                |             | X            |                   |

Figure 3. Schedule of participant recruitment, assessments, and intervention. Abbreviation: iTBS: intermittent theta burst stimulation; RAT: robot-assisted training; FMA-UE: Fugl-Meyer Assessment-Upper Extremity scores; ARAT: action research arm test; EEG: electroencephalography.

72x70mm (300 x 300 DPI)



1  
2  
3  
4  
5  
6  
7  
8  
9  
10  
11  
12  
13  
14  
15  
16  
17  
18  
19  
20  
21  
22  
23  
24  
25  
26  
27  
28  
29  
30  
31  
32  
33  
34  
35  
36  
37  
38  
39  
40  
41  
42  
43  
44  
45  
46  
47  
48  
49  
50  
51  
52  
53  
54  
55  
56  
57  
58  
59  
60

Supplementary section

**The Effects of Priming Intermittent Theta Burst Stimulation  
on Upper Limb Motor Recovery After Stroke: Study  
Protocol for a Randomized Controlled Trial**

Jack J.Q. ZHANG and Kenneth N.K. FONG

Department of Rehabilitation Sciences, The Hong Kong Polytechnic University,

Kowloon, Hong Kong SAR, China

|                                            |     |
|--------------------------------------------|-----|
| Table S1. Trial registration data          | 2-5 |
| Appendix: Template of written consent form | 6-9 |

**Table S1. Trial registration data**

| <b>Data category</b>                          | <b>Information</b>                                                                                                                                                                                              |
|-----------------------------------------------|-----------------------------------------------------------------------------------------------------------------------------------------------------------------------------------------------------------------|
| Primary registry and trial identifying number | ClinicalTrials.gov<br>NCT04034069                                                                                                                                                                               |
| Date of registration in primary registry      | First posted: July 26, 2019<br>Late Update: October 18, 2019                                                                                                                                                    |
| Secondary identifying numbers                 | HSEARS20190718003                                                                                                                                                                                               |
| Source(s) of monetary or material support     | The Hong Kong Polytechnic University<br>Department of Rehabilitation Sciences                                                                                                                                   |
| Primary sponsor                               | The Hong Kong Polytechnic University<br>Department of Rehabilitation Sciences                                                                                                                                   |
| Secondary sponsor(s)                          | No applicable                                                                                                                                                                                                   |
| Contact for public queries                    | Jack J.Q. ZHANG, MSc<br>Email: <a href="mailto:17902718r@connect.polyu.hk">17902718r@connect.polyu.hk</a>                                                                                                       |
| Contact for scientific queries                | Jack J.Q. ZHANG, MSc<br>Email: <a href="mailto:17902718r@connect.polyu.hk">17902718r@connect.polyu.hk</a><br>Kenneth. N.K. FONG, PhD<br>Email: <a href="mailto:rsnkfong@polyu.edu.hk">rsnkfong@polyu.edu.hk</a> |

|                                           |                                                                                                       |
|-------------------------------------------|-------------------------------------------------------------------------------------------------------|
| Public title                              | The Effects of Priming Intermittent Theta Burst Stimulation on Upper Limb Motor Recovery After Stroke |
| Scientific title                          | The Effects of Priming Intermittent Theta Burst Stimulation on Upper Limb Motor Recovery After Stroke |
| Countries of recruitment                  | Hong Kong SAR, China                                                                                  |
| Health condition(s) or problem(s) studied | Stroke                                                                                                |
| Intervention(s)                           | Active comparator: cTBS + iTBS, in addition to robot-assisted training                                |
|                                           | Active comparator: Sham cTBS + iTBS, in addition to robot-assisted training                           |
|                                           | Placebo comparator: Sham cTBS + sham iTBS, in addition to robot-assisted training                     |
| Key inclusion and exclusion criteria      | Ages eligible for study: 18-75 years                                                                  |
|                                           | Sexes eligible for study: both                                                                        |
|                                           | Accepts healthy volunteers: no                                                                        |
|                                           | Inclusion criteria: Chronic stroke patients (1 to 6                                                   |

|                         |                                                                                                                                                                                                         |
|-------------------------|---------------------------------------------------------------------------------------------------------------------------------------------------------------------------------------------------------|
|                         | years after stroke onset), with upper limb impairment (FTUHK from 2 to 7).                                                                                                                              |
|                         | Exclusion criteria: Not free of TMS contraindications; primary neurological disease excluding stroke, notable cognitive impairment (AMT < 6), extreme spasticity in any hemiplegic upper limb (MAS > 2) |
| Study type              | Interventional                                                                                                                                                                                          |
|                         | Allocation: randomized intervention model.<br>Parallel assignment masking: single-blinded (outcomes assessor).                                                                                          |
|                         | Primary purpose: intervention                                                                                                                                                                           |
| Date of first enrolment | September 2019                                                                                                                                                                                          |
| Target sample size      | 36                                                                                                                                                                                                      |
| Recruitment status      | Recruiting                                                                                                                                                                                              |
| Primary outcome(s)      | FMA-UE and ARAT                                                                                                                                                                                         |
| Key secondary outcomes  | Kinematic metrics (i.e., size of active range of motion, mean velocity, hand path ratio)                                                                                                                |

1  
2  
3  
4 Abbreviations: cTBS: Continuous Theta Burst Stimulation; iTBS: Intermittent Theta

5  
6  
7 Burst Stimulation; AMT: Abbreviated Mental Test; MAS: Modified Ashworth Scale;

8  
9  
10 FMA-UE: Fugl-Meyer Assessment - Upper Extremity Scores; ARAT: Action Research

11  
12  
13 Arm Test  
14  
15  
16  
17  
18  
19  
20  
21  
22  
23  
24  
25  
26  
27  
28  
29  
30  
31  
32  
33  
34  
35  
36  
37  
38  
39  
40  
41  
42  
43  
44  
45  
46  
47  
48  
49  
50  
51  
52  
53  
54  
55  
56  
57  
58  
59  
60

For peer review only

## Appendix: Template of written consent form

### Research Consent Form The Hong Kong Polytechnic University Department of Rehabilitation Sciences

#### **Title of research project:**

The Effects of Priming Intermittent Theta Burst Stimulation (iTBS) on Upper Limb Motor Recovery After Stroke: A Randomized Controlled Trial

#### **Research setting:**

Department of Rehabilitation Sciences, The Hong Kong Polytechnic University

#### **Research investigator:**

Mr. Jack J.Q. Zhang (PhD candidate, Department of Rehabilitation Sciences, The Hong Kong Polytechnic University)

Dr. Kenneth N.K. Fong (Associate Professor, Department of Rehabilitation Sciences, The Hong Kong Polytechnic University)

The purpose of this study is to investigate whether priming iTBS can enhance the therapeutic response to robot-assisted training for rehabilitating the hemiplegic upper limb functions in stroke patients. Participants need complete 10 training sessions. During each training session, participants will receive two sessions of transcranial magnetic stimulation in a form of theta burst stimulation (TBS). Immediately after the brain stimulation, participants will perform motor training assisted by robotic devices. Assessment for hemiplegic upper limb functions will be conducted in baseline, after 5-session, after 10-session and two weeks follow up. Some participants will be invited to join EEG examinations

#### **Benefits for participants and society**

The study will provide preliminary evidence of the effect of priming iTBS on stroke rehabilitation and its neural mechanisms. By participating in this study, you can receive several sessions of upper limb motor training and you do not have to pay any additional research-related payment. After the completion of 10-session of training, you will receive a transportation allowance of HK\$100. For participants who join the EEG examinations, additional HK\$400 will be paid as a compensation of time.

### **Potential risks**

Although TBS is safe for most people, there may be unnecessary risks for some people. We need screen whether the participants have implanted metal objects, such as cardiac pacemakers, surgical aneurysm stents, artificial cochlear implants, or pregnancy. Before TBS, the participants should remove all metal objects on the body, such as hearing aids, dentures, orthopedic frames, watches, glasses, jewelry, any metal object on clothes, etc. In addition, it is very rare that TBS may induce seizure. Participants with a seizure/epilepsy history will not be included for this study. Other adverse effects include mild headaches and discomfort, mild cognitive or psychiatric symptoms (mild depression or mania). When strictly following the safety guidelines, those adverse effects are extremely rare.

### **Data confidentiality**

Every participant has the right to obtain his or her personal data and publicly reported research results, if needed. According to the Law in Hong Kong (in particular the Personal Data (Privacy) Ordinance, Chapter 486), you have the right to keep your personal data confidential, such as any collection, storage, reservation, management, control and use (analysis/comparison) regarding the personal data. The information will not be transferred in Hong Kong and other places. If you have any questions, you can consult the Office of the Privacy Commissioner for Personal Data or contact their office (telephone number: 2827 2827) to properly supervise or supervise your personal data protection so that you can fully understand the meaning of legal protection of privacy information.

After agreeing to participate in the study, you authorize the following:

- In order to monitor this study, you need authorize the principal investigator and his or her research team and research ethics committee to obtain, use and retain your personal data in the manner specified in this study and this consent form, and
- In order to check and verify the completeness of the research data and reach the consistency between research regulations and any relevant requirements, you need authorize relevant government agencies (such as the Hong Kong Department of Health, Hospital Authority) to obtain your personal data

### **Voluntary participation:**

Your participation in this research program is entirely voluntary. You may choose not to participate or may stop participating in this study at any time without any changes or loss of medical care that you accept now and in the future.

### **New information**

If there is any new information about the study that will affect your decision to continue participating in this study, you will be notified in first time. You will be notified during the study if there are significant changes in this study that can influence your health or your willingness to participate in the study. You may have to sign a new consent form to indicate that you have been informed of new information about the study.

### **Exit and termination of this study**

You are free to decide whether or not to participate in the study, and you may withdraw your consent at any time during the course of the study and withdraw from the study without giving any reason. It will not cause any unpleasantness or affect the medical care of your doctors in the future. The research principle investigator may also suspend the study when it is necessary. If no special request is made to destroy the data collected prior to the drop out, we will continue to use it. Participants will be given enough time to consider whether to participate in the study.

### **Study results**

The results of this study may be published in medical journals or at medical conferences. Information related to your identity will not appear in any publicly available reports related to this study.

### **Contact person**

If you need further information, you can contact the research investigators -- Mr. Jack J.Q, ZHANG at 65261304 or Dr. Nai Kuen Kenneth FONG, Department of Rehabilitation Sciences, Hong Kong Polytechnic University, 27666716.

If you have any questions about the rights enjoyed as a research participant, you can contact Ms. Chung (Secretary of the Research Committee of the Department of Rehabilitation Sciences, The Hong Kong Polytechnic University) at 27664329.

Your participation in this study will require you to sign and keep a copy of the consent form.



### Consent form

**Title of research project:** The Effects of Priming Intermittent Theta Burst Stimulation (iTBS) on Upper Limb Motor Recovery After Stroke: A Randomized Controlled Trial

1. I am sure that I have read and understood the information sheet of the above research study (and I have the opportunity to ask any question about this study).

2. I understand that some of my current medical records may be checked by researchers at the Hong Kong Polytechnic University. I therefore allow these researchers to check my records.

3. I agree to use the data collected in this study for stroke research. I allow the data yielded from this study to be used for publication. I understand that my identity will be treated confidentially. Any shared and published data will be completely anonymous, so I will not be identified.

4. I understand that my participation is voluntary, and I am free to withdraw at any time without any reason. The medical care or legal rights I accept now and, in the future, will not be affected.

5. My signature of this informed consent does not mean that I waive any legal rights.

6. I agree to participate in the above research projects.

7. I understand that I will get a copy of this consent form.

|                                 |           |      |
|---------------------------------|-----------|------|
| Participant name                | Signature | Date |
| Witness name<br>(If applicable) | Signature | Date |
| Researcher name                 | Signature | Date |

# Reporting checklist for protocol of a clinical trial.

Based on the SPIRIT guidelines.

## Instructions to authors

Complete this checklist by entering the page numbers from your manuscript where readers will find each of the items listed below.

Your article may not currently address all the items on the checklist. Please modify your text to include the missing information. If you are certain that an item does not apply, please write "n/a" and provide a short explanation.

Upload your completed checklist as an extra file when you submit to a journal.

In your methods section, say that you used the SPIRIT reporting guidelines, and cite them as:

Chan A-W, Tetzlaff JM, Altman DG, Laupacis A, Gøtzsche PC, Krleža-Jerić K, Hróbjartsson A, Mann H, Dickersin K, Berlin J, Doré C, Parulekar W, Summerskill W, Groves T, Schulz K, Sox H, Rockhold FW, Rennie D, Moher D. SPIRIT 2013 Statement: Defining standard protocol items for clinical trials. *Ann Intern Med.* 2013;158(3):200-207

Reporting Item

Page Number

### Administrative

#### information

|       |                    |                                                                                                              |   |
|-------|--------------------|--------------------------------------------------------------------------------------------------------------|---|
| Title | <a href="#">#1</a> | Descriptive title identifying the study design, population, interventions, and, if applicable, trial acronym | 1 |
|-------|--------------------|--------------------------------------------------------------------------------------------------------------|---|

|    |                     |                     |                                                          |               |
|----|---------------------|---------------------|----------------------------------------------------------|---------------|
| 1  | Trial registration  | <a href="#">#2a</a> | Trial identifier and registry name. If not yet           | 3             |
| 2  |                     |                     | registered, name of intended registry                    |               |
| 3  |                     |                     |                                                          |               |
| 4  |                     |                     |                                                          |               |
| 5  |                     |                     |                                                          |               |
| 6  | Trial registration: | <a href="#">#2b</a> | All items from the World Health Organization Trial       | Supplementary |
| 7  | data set            |                     | Registration Data Set                                    | section       |
| 8  |                     |                     |                                                          |               |
| 9  |                     |                     |                                                          |               |
| 10 |                     |                     |                                                          |               |
| 11 |                     |                     |                                                          | Table S1      |
| 12 |                     |                     |                                                          |               |
| 13 |                     |                     |                                                          |               |
| 14 |                     |                     |                                                          |               |
| 15 | Protocol version    | <a href="#">#3</a>  | Date and version identifier                              | Supplementary |
| 16 |                     |                     |                                                          | section       |
| 17 |                     |                     |                                                          |               |
| 18 |                     |                     |                                                          |               |
| 19 |                     |                     |                                                          |               |
| 20 |                     |                     |                                                          | Table S1      |
| 21 |                     |                     |                                                          |               |
| 22 |                     |                     |                                                          |               |
| 23 | Funding             | <a href="#">#4</a>  | Sources and types of financial, material, and other      | 22            |
| 24 |                     |                     | support                                                  |               |
| 25 |                     |                     |                                                          |               |
| 26 |                     |                     |                                                          |               |
| 27 |                     |                     |                                                          |               |
| 28 |                     |                     |                                                          |               |
| 29 | Roles and           | <a href="#">#5a</a> | Names, affiliations, and roles of protocol contributors  | 1; 22         |
| 30 | responsibilities:   |                     |                                                          |               |
| 31 |                     |                     |                                                          |               |
| 32 | contributorship     |                     |                                                          |               |
| 33 |                     |                     |                                                          |               |
| 34 |                     |                     |                                                          |               |
| 35 |                     |                     |                                                          |               |
| 36 | Roles and           | <a href="#">#5b</a> | Name and contact information for the trial sponsor       | Supplementary |
| 37 | responsibilities:   |                     |                                                          | section       |
| 38 |                     |                     |                                                          |               |
| 39 | sponsor contact     |                     |                                                          |               |
| 40 |                     |                     |                                                          |               |
| 41 |                     |                     |                                                          | Table S1      |
| 42 | information         |                     |                                                          |               |
| 43 |                     |                     |                                                          |               |
| 44 |                     |                     |                                                          |               |
| 45 |                     |                     |                                                          |               |
| 46 | Roles and           | <a href="#">#5c</a> | Role of study sponsor and funders, if any, in study      | Supplementary |
| 47 | responsibilities:   |                     | design; collection, management, analysis, and            | section       |
| 48 |                     |                     |                                                          |               |
| 49 | sponsor and funder  |                     | interpretation of data; writing of the report; and the   |               |
| 50 |                     |                     |                                                          | Table S1      |
| 51 |                     |                     |                                                          |               |
| 52 |                     |                     |                                                          |               |
| 53 |                     |                     | decision to submit the report for publication, including |               |
| 54 |                     |                     |                                                          |               |
| 55 |                     |                     | whether they will have ultimate authority over any of    |               |
| 56 |                     |                     |                                                          |               |
| 57 |                     |                     | these activities                                         |               |
| 58 |                     |                     |                                                          |               |
| 59 |                     |                     |                                                          |               |
| 60 |                     |                     |                                                          |               |

1 Roles and [#5d](#) Composition, roles, and responsibilities of the NA  
 2  
 3 responsibilities:  
 4 coordinating centre, steering committee, endpoint  
 5 committees  
 6 adjudication committee, data management team, and  
 7  
 8 other individuals or groups overseeing the trial, if  
 9  
 10 applicable (see Item 21a for data monitoring  
 11  
 12 committee)  
 13  
 14

## 15 Introduction

16  
 17  
 18 Background and [#6a](#) Description of research question and justification for 1-8  
 19 rationale  
 20 undertaking the trial, including summary of relevant  
 21 studies (published and unpublished) examining  
 22 benefits and harms for each intervention  
 23  
 24  
 25  
 26

27  
 28 Background and [#6b](#) Explanation for choice of comparators 8  
 29 rationale: choice of  
 30 comparators  
 31  
 32  
 33  
 34  
 35

36 Objectives [#7](#) Specific objectives or hypotheses 8  
 37  
 38

39 Trial design [#8](#) Description of trial design including type of trial (eg, 8  
 40 parallel group, crossover, factorial, single group),  
 41 allocation ratio, and framework (eg, superiority,  
 42 equivalence, non-inferiority, exploratory)  
 43  
 44  
 45  
 46  
 47  
 48

## 49 Methods:

50  
 51 Participants,  
 52 interventions, and  
 53  
 54  
 55  
 56 outcomes  
 57  
 58  
 59  
 60

|    |                      |                      |                                                        |       |
|----|----------------------|----------------------|--------------------------------------------------------|-------|
| 1  | Study setting        | <a href="#">#9</a>   | Description of study settings (eg, community clinic,   | 8-9   |
| 2  |                      |                      | academic hospital) and list of countries where data    |       |
| 3  |                      |                      | will be collected. Reference to where list of study    |       |
| 4  |                      |                      | sites can be obtained                                  |       |
| 5  |                      |                      |                                                        |       |
| 6  |                      |                      |                                                        |       |
| 7  |                      |                      |                                                        |       |
| 8  |                      |                      |                                                        |       |
| 9  |                      |                      |                                                        |       |
| 10 |                      |                      |                                                        |       |
| 11 | Eligibility criteria | <a href="#">#10</a>  | Inclusion and exclusion criteria for participants. If  | 9-10  |
| 12 |                      |                      | applicable, eligibility criteria for study centres and |       |
| 13 |                      |                      | individuals who will perform the interventions (eg,    |       |
| 14 |                      |                      | surgeons, psychotherapists)                            |       |
| 15 |                      |                      |                                                        |       |
| 16 |                      |                      |                                                        |       |
| 17 |                      |                      |                                                        |       |
| 18 |                      |                      |                                                        |       |
| 19 |                      |                      |                                                        |       |
| 20 |                      |                      |                                                        |       |
| 21 | Interventions:       | <a href="#">#11a</a> | Interventions for each group with sufficient detail to | 11-15 |
| 22 |                      |                      | allow replication, including how and when they will be |       |
| 23 | description          |                      | administered                                           |       |
| 24 |                      |                      |                                                        |       |
| 25 |                      |                      |                                                        |       |
| 26 |                      |                      |                                                        |       |
| 27 |                      |                      |                                                        |       |
| 28 |                      |                      |                                                        |       |
| 29 | Interventions:       | <a href="#">#11b</a> | Criteria for discontinuing or modifying allocated      | 11-15 |
| 30 |                      |                      | interventions for a given trial participant (eg, drug  |       |
| 31 | modifications        |                      | dose change in response to harms, participant          |       |
| 32 |                      |                      | request, or improving / worsening disease)             |       |
| 33 |                      |                      |                                                        |       |
| 34 |                      |                      |                                                        |       |
| 35 |                      |                      |                                                        |       |
| 36 |                      |                      |                                                        |       |
| 37 |                      |                      |                                                        |       |
| 38 |                      |                      |                                                        |       |
| 39 | Interventions:       | <a href="#">#11c</a> | Strategies to improve adherence to intervention        | 11-15 |
| 40 |                      |                      | protocols, and any procedures for monitoring           |       |
| 41 | adherence            |                      | adherence (eg, drug tablet return; laboratory tests)   |       |
| 42 |                      |                      |                                                        |       |
| 43 |                      |                      |                                                        |       |
| 44 |                      |                      |                                                        |       |
| 45 |                      |                      |                                                        |       |
| 46 | Interventions:       | <a href="#">#11d</a> | Relevant concomitant care and interventions that are   | 10    |
| 47 |                      |                      | permitted or prohibited during the trial               |       |
| 48 | concomitant care     |                      |                                                        |       |
| 49 |                      |                      |                                                        |       |
| 50 |                      |                      |                                                        |       |
| 51 | Outcomes             | <a href="#">#12</a>  | Primary, secondary, and other outcomes, including      | 15-20 |
| 52 |                      |                      | the specific measurement variable (eg, systolic blood  |       |
| 53 |                      |                      | pressure), analysis metric (eg, change from baseline,  |       |
| 54 |                      |                      |                                                        |       |
| 55 |                      |                      |                                                        |       |
| 56 |                      |                      |                                                        |       |
| 57 |                      |                      |                                                        |       |
| 58 |                      |                      |                                                        |       |
| 59 |                      |                      |                                                        |       |
| 60 |                      |                      |                                                        |       |

1 final value, time to event), method of aggregation  
 2  
 3 (eg, median, proportion), and time point for each  
 4  
 5 outcome. Explanation of the clinical relevance of  
 6  
 7 chosen efficacy and harm outcomes is strongly  
 8  
 9 recommended  
 10

11  
 12  
 13 Participant timeline [#13](#) Time schedule of enrolment, interventions (including Figure 3  
 14 any run-ins and washouts), assessments, and visits  
 15 for participants. A schematic diagram is highly  
 16 recommended (see Figure)  
 17  
 18  
 19  
 20

21  
 22 Sample size [#14](#) Estimated number of participants needed to achieve 10-11  
 23 study objectives and how it was determined,  
 24 including clinical and statistical assumptions  
 25 supporting any sample size calculations  
 26  
 27  
 28  
 29  
 30

31  
 32 Recruitment [#15](#) Strategies for achieving adequate participant 8-9  
 33 enrolment to reach target sample size  
 34  
 35  
 36  
 37

## 38 Methods:

### 39 40 Assignment of 41 interventions (for 42 controlled trials)

43  
 44  
 45  
 46  
 47 Allocation: sequence [#16a](#) Method of generating the allocation sequence (eg, 11  
 48 generation computer-generated random numbers), and list of  
 49 any factors for stratification. To reduce predictability  
 50 of a random sequence, details of any planned  
 51 restriction (eg, blocking) should be provided in a  
 52  
 53  
 54  
 55  
 56  
 57  
 58  
 59  
 60

|    |                        |                                                                            |       |
|----|------------------------|----------------------------------------------------------------------------|-------|
| 1  |                        | separate document that is unavailable to those who                         |       |
| 2  |                        |                                                                            |       |
| 3  |                        | enrol participants or assign interventions                                 |       |
| 4  |                        |                                                                            |       |
| 5  |                        |                                                                            |       |
| 6  | Allocation             | <a href="#">#16b</a> Mechanism of implementing the allocation sequence     | 11    |
| 7  |                        |                                                                            |       |
| 8  | concealment            | (eg, central telephone; sequentially numbered,                             |       |
| 9  |                        |                                                                            |       |
| 10 | mechanism              | opaque, sealed envelopes), describing any steps to                         |       |
| 11 |                        | conceal the sequence until interventions are                               |       |
| 12 |                        |                                                                            |       |
| 13 |                        | assigned                                                                   |       |
| 14 |                        |                                                                            |       |
| 15 |                        |                                                                            |       |
| 16 |                        |                                                                            |       |
| 17 |                        |                                                                            |       |
| 18 | Allocation:            | <a href="#">#16c</a> Who will generate the allocation sequence, who will   | 11    |
| 19 |                        |                                                                            |       |
| 20 | implementation         | enrol participants, and who will assign participants to                    |       |
| 21 |                        | interventions                                                              |       |
| 22 |                        |                                                                            |       |
| 23 |                        |                                                                            |       |
| 24 |                        |                                                                            |       |
| 25 | Blinding (masking)     | <a href="#">#17a</a> Who will be blinded after assignment to interventions | 11-12 |
| 26 |                        |                                                                            |       |
| 27 |                        | (eg, trial participants, care providers, outcome                           |       |
| 28 |                        | assessors, data analysts), and how                                         |       |
| 29 |                        |                                                                            |       |
| 30 |                        |                                                                            |       |
| 31 |                        |                                                                            |       |
| 32 |                        |                                                                            |       |
| 33 | Blinding (masking):    | <a href="#">#17b</a> If blinded, circumstances under which unblinding is   | NA    |
| 34 |                        |                                                                            |       |
| 35 | emergency              | permissible, and procedure for revealing a                                 |       |
| 36 |                        |                                                                            |       |
| 37 | unblinding             | participant's allocated intervention during the trial                      |       |
| 38 |                        |                                                                            |       |
| 39 |                        |                                                                            |       |
| 40 |                        |                                                                            |       |
| 41 | <b>Methods: Data</b>   |                                                                            |       |
| 42 |                        |                                                                            |       |
| 43 | <b>collection,</b>     |                                                                            |       |
| 44 |                        |                                                                            |       |
| 45 | <b>management, and</b> |                                                                            |       |
| 46 |                        |                                                                            |       |
| 47 | <b>analysis</b>        |                                                                            |       |
| 48 |                        |                                                                            |       |
| 49 |                        |                                                                            |       |
| 50 |                        |                                                                            |       |
| 51 | Data collection plan   | <a href="#">#18a</a> Plans for assessment and collection of outcome,       | 16    |
| 52 |                        |                                                                            |       |
| 53 |                        | baseline, and other trial data, including any related                      |       |
| 54 |                        |                                                                            |       |
| 55 |                        | processes to promote data quality (eg, duplicate                           |       |
| 56 |                        |                                                                            |       |
| 57 |                        | measurements, training of assessors) and a                                 |       |
| 58 |                        |                                                                            |       |
| 59 |                        |                                                                            |       |
| 60 |                        |                                                                            |       |

|    |                        |                                                                             |       |
|----|------------------------|-----------------------------------------------------------------------------|-------|
| 1  |                        | description of study instruments (eg, questionnaires,                       |       |
| 2  |                        | laboratory tests) along with their reliability and                          |       |
| 3  |                        | validity, if known. Reference to where data collection                      |       |
| 4  |                        | forms can be found, if not in the protocol                                  |       |
| 5  |                        |                                                                             |       |
| 6  |                        |                                                                             |       |
| 7  |                        |                                                                             |       |
| 8  |                        |                                                                             |       |
| 9  |                        |                                                                             |       |
| 10 | Data collection plan:  | <a href="#">#18b</a> Plans to promote participant retention and complete    | 16-17 |
| 11 | retention              | follow-up, including list of any outcome data to be                         |       |
| 12 |                        | collected for participants who discontinue or deviate                       |       |
| 13 |                        | from intervention protocols                                                 |       |
| 14 |                        |                                                                             |       |
| 15 |                        |                                                                             |       |
| 16 |                        |                                                                             |       |
| 17 |                        |                                                                             |       |
| 18 |                        |                                                                             |       |
| 19 |                        |                                                                             |       |
| 20 | Data management        | <a href="#">#19</a> Plans for data entry, coding, security, and storage,    | 21-22 |
| 21 |                        | including any related processes to promote data                             |       |
| 22 |                        | quality (eg, double data entry; range checks for data                       |       |
| 23 |                        | values). Reference to where details of data                                 |       |
| 24 |                        | management procedures can be found, if not in the                           |       |
| 25 |                        | protocol                                                                    |       |
| 26 |                        |                                                                             |       |
| 27 |                        |                                                                             |       |
| 28 |                        |                                                                             |       |
| 29 |                        |                                                                             |       |
| 30 |                        |                                                                             |       |
| 31 |                        |                                                                             |       |
| 32 |                        |                                                                             |       |
| 33 |                        |                                                                             |       |
| 34 | Statistics: outcomes   | <a href="#">#20a</a> Statistical methods for analysing primary and          | 20    |
| 35 |                        | secondary outcomes. Reference to where other                                |       |
| 36 |                        | details of the statistical analysis plan can be found, if                   |       |
| 37 |                        | not in the protocol                                                         |       |
| 38 |                        |                                                                             |       |
| 39 |                        |                                                                             |       |
| 40 |                        |                                                                             |       |
| 41 |                        |                                                                             |       |
| 42 |                        |                                                                             |       |
| 43 |                        |                                                                             |       |
| 44 | Statistics: additional | <a href="#">#20b</a> Methods for any additional analyses (eg, subgroup      | 20    |
| 45 | analyses               | and adjusted analyses)                                                      |       |
| 46 |                        |                                                                             |       |
| 47 |                        |                                                                             |       |
| 48 |                        |                                                                             |       |
| 49 |                        |                                                                             |       |
| 50 | Statistics: analysis   | <a href="#">#20c</a> Definition of analysis population relating to protocol | 20    |
| 51 | population and         | non-adherence (eg, as randomised analysis), and                             |       |
| 52 | missing data           | any statistical methods to handle missing data (eg,                         |       |
| 53 |                        | multiple imputation)                                                        |       |
| 54 |                        |                                                                             |       |
| 55 |                        |                                                                             |       |
| 56 |                        |                                                                             |       |
| 57 |                        |                                                                             |       |
| 58 |                        |                                                                             |       |
| 59 |                        |                                                                             |       |
| 60 |                        |                                                                             |       |



1 **Methods: Monitoring**

2

3

4 Data monitoring: [#21a](#) Composition of data monitoring committee (DMC); NA

5

6 formal committee

7 summary of its role and reporting structure;

8

9 statement of whether it is independent from the

10

11 sponsor and competing interests; and reference to

12

13 where further details about its charter can be found, if

14

15

16 not in the protocol. Alternatively, an explanation of

17

18 why a DMC is not needed

19

20

21 Data monitoring: [#21b](#) Description of any interim analyses and stopping NA

22

23 interim analysis

24 guidelines, including who will have access to these

25

26 interim results and make the final decision to

27

28 terminate the trial

29

30

31 Harms [#22](#) Plans for collecting, assessing, reporting, and NA

32

33 managing solicited and spontaneously reported

34

35 adverse events and other unintended effects of trial

36

37 interventions or trial conduct

38

39

40

41 Auditing [#23](#) Frequency and procedures for auditing trial conduct, NA

42

43 if any, and whether the process will be independent

44

45 from investigators and the sponsor

46

47

48 **Ethics and**

49

50 **dissemination**

51

52

53

54 Research ethics [#24](#) Plans for seeking research ethics committee / 21

55

56 approval

57 institutional review board (REC / IRB) approval

58

59

60

|    |                    |                      |                                                         |    |
|----|--------------------|----------------------|---------------------------------------------------------|----|
| 1  | Protocol           | <a href="#">#25</a>  | Plans for communicating important protocol              | 21 |
| 2  |                    |                      |                                                         |    |
| 3  | amendments         |                      | modifications (eg, changes to eligibility criteria,     |    |
| 4  |                    |                      | outcomes, analyses) to relevant parties (eg,            |    |
| 5  |                    |                      | investigators, REC / IRBs, trial participants, trial    |    |
| 6  |                    |                      | registries, journals, regulators)                       |    |
| 7  |                    |                      |                                                         |    |
| 8  |                    |                      |                                                         |    |
| 9  |                    |                      |                                                         |    |
| 10 |                    |                      |                                                         |    |
| 11 |                    |                      |                                                         |    |
| 12 |                    |                      |                                                         |    |
| 13 | Consent or assent  | <a href="#">#26a</a> | Who will obtain informed consent or assent from         | 21 |
| 14 |                    |                      | potential trial participants or authorised surrogates,  |    |
| 15 |                    |                      | and how (see Item 32)                                   |    |
| 16 |                    |                      |                                                         |    |
| 17 |                    |                      |                                                         |    |
| 18 |                    |                      |                                                         |    |
| 19 |                    |                      |                                                         |    |
| 20 |                    |                      |                                                         |    |
| 21 | Consent or assent: | <a href="#">#26b</a> | Additional consent provisions for collection and use    | 21 |
| 22 | ancillary studies  |                      | of participant data and biological specimens in         |    |
| 23 |                    |                      | ancillary studies, if applicable                        |    |
| 24 |                    |                      |                                                         |    |
| 25 |                    |                      |                                                         |    |
| 26 |                    |                      |                                                         |    |
| 27 |                    |                      |                                                         |    |
| 28 |                    |                      |                                                         |    |
| 29 | Confidentiality    | <a href="#">#27</a>  | How personal information about potential and            | 21 |
| 30 |                    |                      | enrolled participants will be collected, shared, and    |    |
| 31 |                    |                      | maintained in order to protect confidentiality before,  |    |
| 32 |                    |                      | during, and after the trial                             |    |
| 33 |                    |                      |                                                         |    |
| 34 |                    |                      |                                                         |    |
| 35 |                    |                      |                                                         |    |
| 36 |                    |                      |                                                         |    |
| 37 |                    |                      |                                                         |    |
| 38 |                    |                      |                                                         |    |
| 39 | Declaration of     | <a href="#">#28</a>  | Financial and other competing interests for principal   | 22 |
| 40 | interests          |                      | investigators for the overall trial and each study site |    |
| 41 |                    |                      |                                                         |    |
| 42 |                    |                      |                                                         |    |
| 43 |                    |                      |                                                         |    |
| 44 | Data access        | <a href="#">#29</a>  | Statement of who will have access to the final trial    | 22 |
| 45 |                    |                      | dataset, and disclosure of contractual agreements       |    |
| 46 |                    |                      | that limit such access for investigators                |    |
| 47 |                    |                      |                                                         |    |
| 48 |                    |                      |                                                         |    |
| 49 |                    |                      |                                                         |    |
| 50 |                    |                      |                                                         |    |
| 51 | Ancillary and post | <a href="#">#30</a>  | Provisions, if any, for ancillary and post-trial care,  | NA |
| 52 | trial care         |                      | and for compensation to those who suffer harm from      |    |
| 53 |                    |                      | trial participation                                     |    |
| 54 |                    |                      |                                                         |    |
| 55 |                    |                      |                                                         |    |
| 56 |                    |                      |                                                         |    |
| 57 |                    |                      |                                                         |    |
| 58 |                    |                      |                                                         |    |
| 59 |                    |                      |                                                         |    |
| 60 |                    |                      |                                                         |    |

|    |                       |                      |                                                          |               |
|----|-----------------------|----------------------|----------------------------------------------------------|---------------|
| 1  | Dissemination         | <a href="#">#31a</a> | Plans for investigators and sponsor to communicate       | 21            |
| 2  |                       |                      |                                                          |               |
| 3  | policy: trial results |                      | trial results to participants, healthcare professionals, |               |
| 4  |                       |                      | the public, and other relevant groups (eg, via           |               |
| 5  |                       |                      | publication, reporting in results databases, or other    |               |
| 6  |                       |                      | data sharing arrangements), including any                |               |
| 7  |                       |                      | publication restrictions                                 |               |
| 8  |                       |                      |                                                          |               |
| 9  |                       |                      |                                                          |               |
| 10 |                       |                      |                                                          |               |
| 11 |                       |                      |                                                          |               |
| 12 |                       |                      |                                                          |               |
| 13 |                       |                      |                                                          |               |
| 14 |                       |                      |                                                          |               |
| 15 | Dissemination         | <a href="#">#31b</a> | Authorship eligibility guidelines and any intended use   | 21            |
| 16 |                       |                      |                                                          |               |
| 17 | policy: authorship    |                      | of professional writers                                  |               |
| 18 |                       |                      |                                                          |               |
| 19 |                       |                      |                                                          |               |
| 20 |                       |                      |                                                          |               |
| 21 | Dissemination         | <a href="#">#31c</a> | Plans, if any, for granting public access to the full    | 21            |
| 22 |                       |                      |                                                          |               |
| 23 | policy: reproducible  |                      | protocol, participant-level dataset, and statistical     |               |
| 24 |                       |                      | code                                                     |               |
| 25 | research              |                      |                                                          |               |
| 26 |                       |                      |                                                          |               |
| 27 |                       |                      |                                                          |               |
| 28 |                       |                      |                                                          |               |
| 29 | <b>Appendices</b>     |                      |                                                          |               |
| 30 |                       |                      |                                                          |               |
| 31 |                       |                      |                                                          |               |
| 32 | Informed consent      | <a href="#">#32</a>  | Model consent form and other related documentation       | Supplementary |
| 33 |                       |                      |                                                          |               |
| 34 | materials             |                      | given to participants and authorised surrogates          | section       |
| 35 |                       |                      |                                                          |               |
| 36 |                       |                      |                                                          |               |
| 37 |                       |                      |                                                          | Table S1      |
| 38 |                       |                      |                                                          |               |
| 39 |                       |                      |                                                          |               |
| 40 | Biological            | <a href="#">#33</a>  | Plans for collection, laboratory evaluation, and         | NA            |
| 41 |                       |                      |                                                          |               |
| 42 | specimens             |                      | storage of biological specimens for genetic or           |               |
| 43 |                       |                      | molecular analysis in the current trial and for future   |               |
| 44 |                       |                      | use in ancillary studies, if applicable                  |               |
| 45 |                       |                      |                                                          |               |
| 46 |                       |                      |                                                          |               |
| 47 |                       |                      |                                                          |               |
| 48 |                       |                      |                                                          |               |
| 49 |                       |                      |                                                          |               |

50 None The SPIRIT checklist is distributed under the terms of the Creative Commons Attribution  
51 License CC-BY-ND 3.0. This checklist can be completed online using <https://www.goodreports.org/>, a  
52 tool made by the [EQUATOR Network](#) in collaboration with [Penelope.ai](#)  
53  
54  
55  
56  
57  
58  
59  
60

# BMJ Open

## The Effects of Priming Intermittent Theta Burst Stimulation on Upper Limb Motor Recovery After Stroke: Study Protocol for a Proof-of-Concept Randomized Controlled Trial

|                                 |                                                                                                                                                                                |
|---------------------------------|--------------------------------------------------------------------------------------------------------------------------------------------------------------------------------|
| Journal:                        | <i>BMJ Open</i>                                                                                                                                                                |
| Manuscript ID                   | bmjopen-2019-035348.R1                                                                                                                                                         |
| Article Type:                   | Protocol                                                                                                                                                                       |
| Date Submitted by the Author:   | 11-Feb-2020                                                                                                                                                                    |
| Complete List of Authors:       | ZHANG, Jack; Hong Kong Polytechnic University Faculty of Health and Social Sciences, Department of Rehabilitation Sciences<br>Fong, Kenneth; Hong Kong Polytechnic University, |
| <b>Primary Subject Heading</b>: | Rehabilitation medicine                                                                                                                                                        |
| Secondary Subject Heading:      | Neurology                                                                                                                                                                      |
| Keywords:                       | Stroke < NEUROLOGY, REHABILITATION MEDICINE, NEUROLOGY                                                                                                                         |
|                                 |                                                                                                                                                                                |

SCHOLARONE™  
Manuscripts

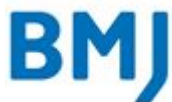

I, the Submitting Author has the right to grant and does grant on behalf of all authors of the Work (as defined in the below author licence), an exclusive licence and/or a non-exclusive licence for contributions from authors who are: i) UK Crown employees; ii) where BMJ has agreed a CC-BY licence shall apply, and/or iii) in accordance with the terms applicable for US Federal Government officers or employees acting as part of their official duties; on a worldwide, perpetual, irrevocable, royalty-free basis to BMJ Publishing Group Ltd ("BMJ") its licensees and where the relevant Journal is co-owned by BMJ to the co-owners of the Journal, to publish the Work in this journal and any other BMJ products and to exploit all rights, as set out in our [licence](#).

The Submitting Author accepts and understands that any supply made under these terms is made by BMJ to the Submitting Author unless you are acting as an employee on behalf of your employer or a postgraduate student of an affiliated institution which is paying any applicable article publishing charge ("APC") for Open Access articles. Where the Submitting Author wishes to make the Work available on an Open Access basis (and intends to pay the relevant APC), the terms of reuse of such Open Access shall be governed by a Creative Commons licence – details of these licences and which [Creative Commons](#) licence will apply to this Work are set out in our licence referred to above.

Other than as permitted in any relevant BMJ Author's Self Archiving Policies, I confirm this Work has not been accepted for publication elsewhere, is not being considered for publication elsewhere and does not duplicate material already published. I confirm all authors consent to publication of this Work and authorise the granting of this licence.

Manuscript submitted to *BMJ Open*

**The Effects of Priming Intermittent Theta Burst Stimulation  
on Upper Limb Motor Recovery After Stroke: Study  
Protocol for a Proof-of-Concept Randomized Controlled  
Trial**

Jack Jiaqi ZHANG and Kenneth N.K. FONG

Department of Rehabilitation Sciences, The Hong Kong Polytechnic University,  
Kowloon, Hong Kong SAR, China

\*Correspondence to:

Jack Jiaqi ZHANG

Department of Rehabilitation Sciences,

The Hong Kong Polytechnic University,

Kowloon, Hong Kong SAR, China

E-mail: 17902718r@connect.polyu.hk

Telephone: +852 2766 4283

## ***Abstract***

**Introduction:** Intermittent Theta Burst Stimulation (iTBS), a form of repetitive Transcranial Magnetic Stimulation (rTMS), delivered to the ipsilesional primary motor cortex (M1), appears to enhance the brain's response to rehabilitative training in patients with stroke. However, its clinical utility is highly subject to variability in different protocols. New evidence has reported that preceding iTBS, with continuous theta burst stimulation (cTBS) may stabilize and even boost the facilitatory effect of iTBS on the stimulated M1, via metaplasticity. The aim of this study is to investigate the effects of iTBS primed with cTBS (i.e., priming iTBS), in addition to robot-assisted training (RAT), on the improvement of the hemiparetic upper limb functions of stroke patients, and to explore potential sensorimotor neuroplasticity using electroencephalography (EEG).

**Methods and analysis:** A three-arm, subjects and assessors-blinded, randomized controlled trial (RCT) will be performed with patients with chronic stroke. An estimated sample of 36 patients will be needed based on the prior sample size calculation. All participants will be randomly allocated to receive 10 sessions of rTMS with different TBS protocols (cTBS+iTBS, sham cTBS+iTBS, and sham cTBS+sham iTBS), three to five sessions per week, for two to three weeks. All participants will receive 60 minutes of RAT after each stimulation session. Primary outcomes will be assessed using Fugl-Meyer Assessment – Upper Extremity scores and Action Research Arm Test.

1  
2  
3  
4 Secondary outcomes will be assessed using kinematic outcomes generated during RAT,  
5  
6  
7 and EEG.  
8  
9

10 **Ethics and dissemination:** Ethical approval has been obtained from The Human  
11  
12  
13 Subjects Ethics Sub-committee, University Research Committee of The Hong Kong  
14  
15  
16 Polytechnic University (Reference number: HSEARS20190718003). The results  
17  
18  
19 yielded from this study will be presented at international conferences and sent to a peer-  
20  
21  
22 review journal to be considered for publication.  
23  
24

25 **Trial registration number:** NCT04034069.  
26  
27

28 **Keywords:** Theta burst stimulation; stroke; hemiparetic upper limb; priming;  
29  
30  
31 metaplasticity.  
32  
33  
34  
35  
36  
37  
38  
39  
40  
41  
42  
43  
44  
45  
46  
47  
48  
49  
50  
51  
52  
53  
54  
55  
56  
57  
58  
59  
60



## Article Summary

### - Strengths and limitations of this study

- This study will be the first randomized controlled trial to explore the effects of priming iTBS in regard to facilitating hemiparetic upper limb recovery in patients with stroke.
- This study investigates sensorimotor desynchronization along with the improvement of upper limb functions, in association with priming iTBS.
- The study attempts to potentiate the brain response to iTBS by using an inhibitory priming session.
- This study contributes to the optimal use of TBS in poststroke upper limb rehabilitation.
- This study has limited generalizability to stroke patients at the acute phase.

## Introduction

Repetitive transcranial magnetic stimulation (rTMS) has been extensively investigated as an add-on form of therapy for stroke rehabilitation.<sup>1</sup> rTMS is usually limited to frequencies of 20 Hz or less, due to safety concerns, in human studies.<sup>2</sup> However, in animal studies, effects on synaptic plasticity are usually induced by repeated short bursts of high-frequency (> 50 Hz) stimulation, given at a frequency from 3 to 5 Hz and known as theta burst stimulation (TBS).<sup>3</sup> Huang *et al.* were the first to investigate the neurophysiological effects of TBS, delivered via a magnetic stimulator, in the human primary motor cortex (M1), and demonstrated that 600-pulse intermittent theta burst stimulation (iTBS) enhanced corticomotor excitability in healthy human subjects, whereas 600-pulse continuous theta burst stimulation (cTBS) did the opposite.<sup>4</sup> Serial TBS sessions delivered at a relatively low intensity were subsequently investigated in stroke survivors and safety concerns regarding TBS in this population appear to be minor and rare.<sup>5-8</sup> Various experiments with humans have also demonstrated that TBS is able to induce neuroplastic changes of the stimulated M1 in a relatively short conditioning period (i.e., 40 seconds for standard 600-pulse cTBS and three minutes for standard 600-pulse iTBS),<sup>9</sup> thus reducing the time spent receiving treatment.

1  
2  
3  
4 A substantial number of clinical trials with stroke patients have revealed that iTBS of  
5  
6  
7 the ipsilesional M1 significantly improves hemiplegic arm<sup>5 6 10-12</sup> and hand<sup>8</sup> motor  
8  
9  
10 functions, compared to sham stimulations. Similar effects have also been observed in  
11  
12  
13 studies using cTBS of the contralesional M1.<sup>13 14</sup> However, some trials have not shown  
14  
15  
16 any additional benefits on upper limb motor outcomes from iTBS or cTBS in stroke  
17  
18  
19 survivors, in contrast to sham TBS.<sup>7 13</sup> A recent meta-analysis showed that a pooled  
20  
21  
22 standardized effect size of iTBS was 0.60, while that of cTBS was 0.35 for upper limb  
23  
24  
25 motor outcomes in patients with stroke,<sup>15</sup> indicating that the increment of the  
26  
27  
28 excitability of the affected M1 through iTBS is critical for improving the brain's  
29  
30  
31 response to motor training in patients with stroke. However, substantial response  
32  
33  
34 variability regarding iTBS among humans may contribute to the use of different  
35  
36  
37 protocols among current studies,<sup>16 17</sup> which limits their clinical utility.

38  
39  
40  
41  
42  
43 It has been shown that the history of neuronal activities is one of the major factors that  
44  
45  
46 could influence the brain's response to TBS.<sup>18</sup> Synaptic plasticity is regulated by  
47  
48  
49 previous neuronal activities via metaplasticity. Metaplasticity is a neuroprotective  
50  
51  
52 mechanism that modulates the threshold of synaptic plasticity to ensure that the neural  
53  
54  
55 system cannot be predominated by long-term potentiation (LTP) or long-term  
56  
57  
58 depression (LTD).<sup>19</sup> Excitatory rTMS over the M1 may be unable to facilitate  
59  
60

1  
2  
3  
4 corticomotor excitability when the neuronal activities have already been elevated  
5  
6  
7 before stimulation, which is likely happening when patients with stroke receive  
8  
9  
10 extensive training before non-invasive brain stimulation.  
11  
12  
13  
14  
15

16 Considering the mechanism of metaplasticity, several priming stimulation protocols,  
17  
18 designed to incorporate a priming session followed by a stimulation session, have been  
19  
20 investigated with healthy individuals.<sup>20</sup> An inhibitory priming stimulation via cTBS  
21  
22 may ensure or even boost the facilitatory effect of subsequent excitatory stimulation  
23  
24 sessions via iTBS. In healthy individuals, this priming protocol seems to amplify the  
25  
26 facilitatory effect of excitatory stimulation, compared with iTBS alone, as reflected by  
27  
28 the increased amplitude of motor evoked potential (MEP).<sup>21-23</sup> Metaplasticity is also  
29  
30 significantly involved in rTMS studies for patients with neuropsychiatric disorders.<sup>24 25</sup>  
31  
32  
33  
34  
35  
36  
37  
38  
39  
40 However, to date no study has investigated the effects of priming iTBS protocols in  
41  
42  
43 patients with stroke.  
44  
45  
46  
47  
48

49 Various neurological biomarkers of stroke motor recovery have been proposed.<sup>26</sup>  
50  
51  
52 Electroencephalography (EEG), a non-invasive measure of cortical neuronal oscillation,  
53  
54  
55 is of great interest, because it is a relatively convenient and well-tolerated  
56  
57  
58 neurophysiological technique for patients with stroke. Sensorimotor event-related  
59  
60

1  
2  
3  
4 desynchronization (ERD), a neurophysiological marker of sensorimotor activation,  
5  
6  
7 could be induced through either action observation or action execution.<sup>27</sup> Previously,  
8  
9  
10 attention has been paid to movement-related sensorimotor ERD, which has been shown  
11  
12  
13 to be correlated with the severity of hemiplegia in patients with stroke.<sup>28 29</sup>  
14  
15  
16 Subsequently, researchers began to investigate sensorimotor ERD induced by  
17  
18  
19 observing mirror visual feedback (MVF) in healthy adults and patients with stroke.<sup>30 31</sup>  
20  
21  
22 A pilot study has demonstrated that multiple sessions of iTBS appear to enhance MVF-  
23  
24  
25 induced sensorimotor ERD in healthy adults.<sup>32</sup> So far, MVF-induced sensorimotor ERD  
26  
27  
28 has not been used as an outcome of neuroplasticity in any clinical stroke trial in order  
29  
30  
31 to examine its potential as a biomarker for stroke motor recovery. Sensorimotor ERD  
32  
33  
34 will be used to probe cortical oscillatory activities of large number of neurons in  
35  
36  
37 different rhythms, during a given task (movement or movement observation). A  
38  
39  
40 previous study comparing the effects of TBS on MEPs and movement-related rhythmic  
41  
42  
43 oscillations showed that the modulatory effect of TBS was more reliable on movement-  
44  
45  
46 related ERD than that on MEPs.<sup>33</sup> The potential explanations may be that TMS-based  
47  
48  
49 metrics may not represent all cortical responses, reflecting exclusively those destined  
50  
51  
52 to the spinal cord,<sup>33</sup> and the magnitude of TMS-based metrics is also contaminated by  
53  
54  
55 the neuronal responses at subcortical and spinal levels, as well as the peripheral MEP,<sup>34</sup>  
56  
57  
58 when a suprathreshold stimulation intensity is used for the measurements. Hence, we  
59  
60

1  
2  
3  
4 decide to use sensorimotor desynchronization in this study, which may provide new  
5  
6  
7 insight about the sensorimotor neuroplasticity in association with priming iTBS.  
8  
9

10  
11  
12  
13 Therefore, our study has two objectives. First, we investigate the effects of 10 sessions  
14  
15  
16 of rTMS using different TBS protocols (i.e., cTBS plus iTBS, sham cTBS plus iTBS,  
17  
18  
19 and sham cTBS plus sham iTBS), in addition to standard robot-assisted training (RAT)  
20  
21  
22 for both the proximal and distal joints of the hemiparetic upper limb, delivered across  
23  
24  
25 three to five sessions per week for two to three weeks, on improving the hemiparetic  
26  
27  
28 upper limb functions of stroke survivors. Fugl-Meyer Assessment - Upper Extremity  
29  
30  
31 (FMA-UE) scores and Action Research Arm Test (ARAT) will be used as the primary  
32  
33  
34 outcome measures. Safety profiles will be systematically collected during each session  
35  
36  
37 of the intervention, using a standard questionnaire. Second, we investigate the effects  
38  
39  
40 of different TBS protocols, cTBS plus iTBS, sham cTBS plus iTBS, and sham cTBS  
41  
42  
43 plus sham iTBS, in addition to RAT, on upper limb kinematic outcomes yielded from  
44  
45  
46 each RAT session, and sensorimotor ERD induced by hemiparetic hand movement and  
47  
48  
49 observation of the MVF of nonparetic hand movement, in patients with stroke.  
50  
51  
52  
53  
54

## 55 **Methods**

56  
57  
58 This study protocol has been written according to the Standard Protocol Items for  
59  
60

1  
2  
3  
4 Randomized Trials statement.<sup>35</sup>  
5  
6  
7  
8  
9

## 10 **Study design**

11  
12  
13 This study is designed as a three-arm, parallel group, subjects- and assessors-blinded,  
14  
15  
16 sham-controlled RCT. Potential participants with stroke will be recruited through  
17  
18  
19 convenience sampling from self-support groups in the community in Hong Kong. The  
20  
21  
22 study will be conducted in a local university laboratory.  
23  
24  
25  
26  
27

## 28 **Inclusion and exclusion criteria**

29  
30  
31 Participants must meet all of the following criteria: (1) have a diagnosis of a unilateral  
32  
33  
34 ischemic or hemorrhagic first-ever stroke; (2) time after stroke onset  $\geq$  6 months;<sup>36</sup>  
35  
36  
37 (3) between 18 and 64 years old; (4) reside in community dwellings; (4) with residual  
38  
39  
40 upper limb impairment  $\geq$  second level in the Functional Test for the Hemiplegic  
41  
42  
43 Upper Extremity (FTHUE).<sup>37</sup> FTHUE is a fast screening tool for upper limb functional  
44  
45  
46 movement, which has been used as a screening in our previous RCTs.<sup>38 39</sup> FTHUE  
47  
48  
49 levels two to four are defined as low upper limb functioning poststroke, and levels five  
50  
51  
52 and seven are defined as high upper limb functioning poststroke;<sup>38</sup> (5) able to  
53  
54  
55 understand simple verbal instruction and follow one-step commands; and (6) able to  
56  
57  
58 give informed written consent to participate in the study.  
59  
60

1  
2  
3  
4  
5  
6  
7 Although TBS is often regarded as safe for certain subjects, the greatest acute risk of  
8  
9  
10 TMS is the rare occurrence of induced seizures. Besides seizures, other risks include  
11  
12  
13 minor pain, such as a headache or local discomfort, minor cognitive changes, and  
14  
15  
16 psychiatric symptoms. In this study, patients who meet any of the following rTMS  
17  
18  
19 contraindications will not be included: (1) unstable medical condition; (2) history of  
20  
21  
22 epileptic seizures, unconsciousness, or intracranial hypertension; (3) serious heart  
23  
24  
25 disease; (4) pregnancy; (5) with metal implants *in vivo*, such as a pacemaker, artificial  
26  
27  
28 cochlear, or implant brain stimulator; (6) history of receiving a craniotomy; and (7)  
29  
30  
31 taking any centrally acting drugs in the recent three months.<sup>2</sup> To ensure safety, the  
32  
33  
34 participants will be under the supervision of at least one investigator who has completed  
35  
36  
37 training in TMS. All participants will undergo a safety screening for the potential risks  
38  
39  
40 of TMS to ensure they are eligible to participate in this study.<sup>2</sup>  
41  
42  
43  
44  
45

46 In addition to TMS contraindications, participants who meet any of the following  
47  
48  
49 criteria will be also excluded: (1) previous diagnosis of any neurological disease  
50  
51  
52 excluding stroke; (2) presence of any sign of cognitive problems (Abbreviated Mental  
53  
54  
55 Test, Hong Kong Cantonese version  $< 6/10$ );<sup>40</sup> (3) patients with extreme spasticity over  
56  
57  
58 the elbow or wrist in the hemiparetic upper limb (Modified Ashworth score  $> 2$ ),<sup>41</sup> or  
59  
60



1  
2  
3  
4 severe pain that hinders upper limb movement; (4) other notable impairments of the  
5  
6  
7 upper limb not affected by stroke (e.g., a recent fracture, severe osteoarthritis,  
8  
9  
10 congenital upper limb deformity); (5) significant aphasia or difficulty understanding  
11  
12  
13 the instructions given by the investigators; (6) any sign of anxiety and/or depression  
14  
15  
16 screened by the Hospital Anxiety and Depression Scale (HADS), using a cut-off value  
17  
18  
19 of 8 in both subscales;<sup>42</sup> and (7) concurrent participation in upper limb rehabilitation  
20  
21  
22 training in a hospital, university laboratory or other rehabilitation settings, or active  
23  
24  
25 participation in another clinical trial.  
26  
27  
28  
29  
30

### 31 **Sample size estimation**

32  
33  
34 Since the difference among the effects of priming iTBS in hemiparetic upper limb  
35  
36  
37 training has not been previously investigated, we have estimated the sample size based  
38  
39  
40 on current studies comparing iTBS and sham stimulation. A recent meta-analysis yields  
41  
42  
43 a pooled Cohen's *d* of 0.60 for a two-group design in favor of iTBS improving upper  
44  
45  
46 limb motor outcomes, in contrast to sham stimulation.<sup>15</sup> An effect size (*d*) of 0.60  
47  
48  
49 corresponds approximately to an effect size (*f*) of 0.30 for a study design of three-group  
50  
51  
52 comparisons. An estimate of sample size for each group in a three-group design, given  
53  
54  
55 a power of 0.80 and a two-tailed alpha error probability of 0.05, is 27 patients in total.  
56  
57  
58 When considering the drop-out rate of 20%, we therefore plan to recruit 12 participants  
59  
60

1  
2  
3  
4 for each group (a total of 36) for this study.  
5  
6  
7  
8  
9

## 10 **Randomization**

11  
12  
13 Three parallel groups will be employed: (1) cTBS plus iTBS; (2) sham cTBS plus iTBS;  
14  
15 and (3) sham cTBS plus sham iTBS. The collection of demographic characteristics (age,  
16  
17 gender, education, side of hemiplegia, handedness, type of stroke, time from onset to  
18  
19 treatment, lesion site(s)) and baseline assessments will be performed prior to  
20  
21 randomization. Participants' medical information related to their stroke will be  
22  
23 retrieved from the electronic clinical management system in the hospital after receiving  
24  
25 consent. All participants will be randomly allocated in a 1:1:1 ratio to each group after  
26  
27 the screening and baseline assessments have been carried out. A random sequence will  
28  
29 be generated using Minimize software.<sup>43</sup> Participants will be pre-stratified based on  
30  
31 their hemiparetic upper limb functioning (i.e., FTHUE high functioning vs. low  
32  
33 functioning). The allocation sequence will be concealed from all investigators and  
34  
35 assessors. Participants will receive 10 sessions of TBS intervention combined with  
36  
37 RAT, 3 to 5 sessions per week, for two to three weeks. We decide to adopt a more  
38  
39 flexible training schedule, because most community stroke survivors are unable to visit  
40  
41 our laboratory on a daily basis. Similar schedule for motor training has been used in  
42  
43 previous studies for patients with chronic stroke.<sup>44 45</sup>  
44  
45  
46  
47  
48  
49  
50  
51  
52  
53  
54  
55  
56  
57  
58  
59  
60

## Intervention

### TBS session

A total of 10 sessions of TBS will be delivered using MagPro magnetic stimulators (MagVenture, Denmark) connected with a figure-of-eight coil. Resting motor threshold (RMT) is defined as the minimum stimulation intensity over the hot spot that could elicit a motor evoked potential (MEP) of no less than 50  $\mu\text{V}$  in five out of ten trials over the contralesional first dorsal interosseous (FDI) muscle. The stimulation point is the hotspot mirrored over the midsagittal line (i.e., ipsilesional M1), verified and maintained by a TMS-navigation system (Localite, Bonn, Germany).

We follow the standard 600-pulse TBS protocol proposed by Huang *et al.*<sup>4</sup>: iTBS: 20 trains of 10 bursts given with eight-second intervals, with a total of 600 pulses, around 3-minute per session; cTBS: 20 trains of 10 bursts given with 0.2-second intervals, with a total of 600 pulses, around 40 seconds per session. All stimulations will be delivered over the ipsilesional M1. The intensity of the TBS will be set at 70% RMT. Sham cTBS will be delivered with the same coil, but the intensity will be reduced to 20% of the individual RMT. Intensity reduction has been used as sham stimulation in some previous clinical studies,<sup>5 46</sup> and our pilot study.<sup>32</sup> The interval between the priming

1  
2  
3  
4 session and the conditioning session will be 10 minutes.<sup>21 25</sup> All participants will be  
5  
6  
7 informed that TBS is delivered in a subthreshold intensity that cannot induce significant  
8  
9  
10 limb movement or somatosensory perception.  
11  
12  
13  
14  
15

### 16 **Robot-assisted training**

17  
18  
19 Participants will be required to undergo two forms of RAT for the proximal and distal  
20  
21 joints of the hemiparetic upper limb, respectively, after each TBS session. RAT will  
22  
23 commence five minutes after the completion of the TBS session.<sup>11</sup> A Fourier M2 robot  
24  
25 (Fourier Intelligence Company Limited., Shanghai, China) will be used for the upper  
26  
27 limb proximal joint training. The Fourier M2 robot is an end-effector robot-assisted  
28  
29 upper limb rehabilitation device, supported by tailored interactive television games in  
30  
31 the device. A HandyRehab hand robot (Zunosaki Company Limited., Hong Kong SAR,  
32  
33 China) will be used for upper limb distal joint training. The device provides power-  
34  
35 driven extension and grasping force to the fingers and thumb in order to assist the  
36  
37 patient with opening and closing the paretic hand by means of surface  
38  
39 electromyography (EMG) triggered from the signals through the forearm extensors and  
40  
41 flexors. Active and passive modes are available in both robots. Whenever patients are  
42  
43 unable to use the active modes due to the severity of the upper limb hemiplegia, passive  
44  
45 modes will be used.  
46  
47  
48  
49  
50  
51  
52  
53  
54  
55  
56  
57  
58  
59  
60

## Proximal joint training

The Fourier M2 robot targets (1) flexion and extension of the shoulder joint; (2) flexion and extension of the elbow; (3) internal and external rotation of the shoulder joint; and (4) abduction and adduction of the shoulder joint. Before each training session, the size of the maximal active range of motion (ROM) for the hemiplegic upper limb will be assessed for each participant. Two-minute warm-up sessions will be delivered before and after each training session, in which participants will receive passive-mode RAT to mobilize the paretic upper limb. The movement trajectory will be predefined as a square and its size will be calculated based on participants' maximal active ROM. In the training session, the participants will be asked to move their hemiparetic upper limb to reach sequentially presented targets in an interactive game. Each proximal joint training session will last for around 30 minutes, with a break of five to 10 minutes (see Figure 1A for a demonstration of proximal joint RAT). The assistive mode will be used to train the patients with limited voluntary shoulder and elbow movement (i.e., the patient initiates the movement and the robot then produces assistive force according to the subject's effort). For patients who cannot initiate movement by themselves, the passive mode will be used. The active mode and resistive mode will be used to train the patients with voluntary shoulder and elbow movement. Each participant has to sit in front of the

1  
2  
3  
4 robot with a computer screen attached to the device. The participant will wear a trunk-  
5  
6  
7 fixed belt to minimize compensatory movement of the trunk during training.  
8  
9

### 10 11 12 13 **Distal joint training** 14

15  
16 The HandyRehab hand robot is lightweight, powered by lithium batteries, and allows  
17  
18 the subject to perform a full hand grasp/release movement in either the spherical grip  
19  
20 or cylindrical grip mode. The EMG trigger threshold will be adjusted based on patients'  
21  
22 hemiplegic arm function. Participants will be instructed to perform the different types  
23  
24 of hand movements to pick up an object (i.e., a ball, sponge, or a cup) on a table, move  
25  
26 it vertically and/or horizontally to four predefined targets, and release the object. The  
27  
28 distance between the targets and participants will be adjusted based on their active  
29  
30 ROM of proximal joints in the paretic upper limb. The EMG-triggered level will be  
31  
32 adjusted based on patients' ability (i.e., active mode) and gradually increased as the  
33  
34 training progresses. For patients without any detectable EMG signal from the paretic  
35  
36 forearm, the passive mode will be used. Each distal joint training session will last for  
37  
38 around 30 minutes, with a break of five to 10 minutes (see Figure 1B for a  
39  
40 demonstration of distal joint RAT). In total, each RAT session lasts for approximately  
41  
42 60 minutes (30 minutes for proximal joints and 30 minutes for distal joints), with 10  
43  
44 sessions in total. An investigator with a background in physiotherapy or occupational  
45  
46  
47  
48  
49  
50  
51  
52  
53  
54  
55  
56  
57  
58  
59  
60

1  
2  
3  
4 therapy will supervise each participant during each robot training session to ensure the  
5  
6  
7 correct positioning is used and that participants become familiar with the training.  
8  
9

## 10 11 12 13 **Outcome measurements**

### 14 15 16 **Primary outcomes**

17  
18  
19 The FMA-UE and ARAT will be used as the primary outcomes for this study.<sup>47</sup> The

20  
21  
22 FMA-UE is a clinical assessment for upper limb motor impairment after stroke. It  
23  
24  
25 includes 33 items assessing the movement, coordination, and reflex actions of the  
26  
27  
28 shoulder, elbow, forearm, and wrist, and the hand joints of the paretic arm. Each item  
29  
30  
31 consists of a three-point scale (zero, one, and two), with a total maximum score of 66.

32  
33  
34 The minimal clinically important difference (MCID) of the FMA-UE is 5.25 points.<sup>48</sup>

35  
36  
37 The FMA-UE will be conducted at four time points: baseline, mid-term (i.e., after five  
38  
39  
40 sessions), post-training (i.e., after 10 sessions), and follow-up (i.e., two weeks after the  
41  
42  
43 completion of all training sessions). An assessor who is unaware of the treatment  
44  
45  
46 allocation will carry out the assessment for each participant. The ARAT is a clinical  
47  
48  
49 assessment for upper limb functional activities for patients with stroke. The ARAT  
50  
51  
52 assesses proximal and distal components of upper limb function. It consists of four  
53  
54  
55 subscales: grasp, grip, pinch, and gross movement. It has 19 movement tasks, each  
56  
57  
58 graded using a four-point scale (total scores range from 0 to 57). The MCID of ARAT  
59  
60

1  
2  
3  
4 is 5.70 points.<sup>49</sup> ARAT will be conducted at the same four time points as the FMA-UE.  
5  
6

7 An assessor who is unaware of the treatment allocation will carry out the assessment  
8  
9  
10 for each participant. Assessors will be trained and tested by the principle investigator,  
11  
12  
13 before conducting clinical assessments.  
14  
15  
16  
17

### 18 19 **Secondary outcomes**

20  
21 Kinematic metrics generated during each session of RAT will be used as secondary  
22  
23 outcomes for the participants' upper limb function. The following kinematic metrics  
24  
25 retrieved from the M2 robot will be used as the upper limb motor outcomes in a further  
26  
27 analysis: (1) the size of the maximal active ROM; (2) the mean velocity of movement  
28  
29 during the training session; and (3) the movement trajectory during the training session.  
30  
31  
32 Movement trajectory will be further calculated as the hand-path ratio, which is defined  
33  
34 as the real distance divided by the shortest distance between object targets.<sup>50</sup>  
35  
36  
37  
38  
39  
40  
41  
42  
43  
44  
45

46 In order to investigate the potential neuroplasticity elicited by the training, we will  
47  
48 invite patients to participate in EEG examinations. We expect that around five patients  
49  
50 from each group will take part in the EEG examinations before and after the  
51  
52 intervention. Kinematic and EEG outcomes will be assessed in a non-blinded manner  
53  
54  
55  
56  
57  
58 (see Figure 2 for a flowchart).  
59  
60



## EEG acquisition

EEG will be captured with a 64-channel cap using a Digital DC EEG Amplifier.

Electrode impedance will be kept below 10 kOhm and the signal will be sampled at

1000 Hz. Movement-related ERD and MVF-induced ERD will be evaluated in this

study. For movement-related ERD, participants will be asked to perform finger taps

three times (or attempt to move their finger if they cannot perform the movement

fluently) on a computer keyboard with the index finger of their unaffected side, in

response to auditory cues (i.e., a 300-ms beep sound) delivered at random intervals

(from seven seconds to 10 seconds), and to relax their hand after the completion of the

movement.

For MVF-induced ERD, participants will be asked to perform finger taps three times

on a computer keyboard with the index finger of their unaffected side, in response to

auditory cues delivered at random intervals (from seven seconds to 10 seconds),<sup>51</sup> and

to relax their hand after the completion of the movement. A widely used EEG paradigm

exploring the effects of MVF will be utilized in the present study,<sup>30-32 51 52</sup> movements

will be performed under two conditions. (1) MVF of the hand movement: Participants

will be required to perform unilateral finger tapping while viewing MVF. MVF will be

1  
2  
3  
4 created using a physical mirror (406 × 432 mm) placed over their midsagittal plane,  
5  
6  
7 between both arms. (2) Direct visual feedback (DVF) of the hand movement:  
8  
9  
10 Participants will be required to perform unilateral finger tapping while directly looking  
11  
12  
13 at their moving finger. The affected hand will be hidden by a non-reflective board.  
14  
15  
16  
17  
18

19 The order of conditions will be allocated randomly by drawing lots. A total of 60  
20  
21  
22 movements will be collected for each condition (affected index movement, unaffected  
23  
24  
25 index with mirror view, and unaffected index with direct view), with 180 movements  
26  
27  
28 in total.  
29  
30  
31  
32  
33

### 34 **EEG preprocessing**

35  
36  
37 Raw EEG signals will be band-pass filtered between 1 and 80 Hz and then down-  
38  
39  
40 sampled at 250 Hz. Additionally, a 50-Hz notch filter will be applied. Data will be  
41  
42  
43 offline re-referenced to bilateral mastoid electrodes. Signals with significant movement  
44  
45  
46 artifacts and long-term eye closure will be rejected during a visual inspection.  
47  
48  
49 Subsequently, EEG will be segmented in 7000 ms epochs (pre-stimulus -3000 ms and  
50  
51  
52 post-stimulus 4000 ms, with 0 as the first finger tap). Eye movement artifacts will be  
53  
54  
55 corrected using an independent component analysis algorithm.<sup>53</sup> Typical components  
56  
57  
58 reflecting the eye blinks and horizontal movements will then be rejected.  
59  
60

## EEG time-frequency analysis

Clean epochs will be analyzed in a time-frequency domain. The event-related spectral perturbation (ERSP) method using the *newtimef* function of EEGLAB<sup>54</sup> will be used to compute the ERD power. The ERD power will be baseline corrected. Subsequently, the power will be averaged across all trials and converted to log power. Averaged ERD powers at electrode sites C3 (ipsilesional hemisphere, IH) and C4 (contralesional hemisphere, CH) will be extracted. Data from patients with right brain lesions will be flipped to ensure that C3 channels stand for IHs and C4 channels stand for CHs.

For movement-related ERD, the power at C3 will be used for further analysis. For MVF-induced ERD, the powers at IH and CH during the movement phase will be extracted and an asymmetric index will be calculated with the following formula:<sup>55</sup>

$$\text{Asymmetric index} = (\text{IH ERD power}) - (\text{CH ERD power})$$

The difference of asymmetric indices under the mirror view and direct view will be used to evaluate MVF-induced sensorimotor ERD and used in a further analysis. A more negative value indicates more activation toward the ipsilesional sensorimotor area,

1  
2  
3  
4 during the mirror view condition, compared to the direct view condition. Mu-1 (8-10  
5  
6  
7 Hz), mu-2 (10-12 Hz), beta-1 (12-16 Hz), and beta-2 (16-30 Hz) will be investigated  
8  
9  
10 separately.<sup>32</sup>  
11  
12  
13  
14  
15

### 16 **Safety profile investigation**

17  
18  
19 A side-effects survey will be distributed upon completion of each TBS session. See  
20  
21  
22 Figure 3 for an overview of the proposed trial.  
23  
24  
25  
26  
27

### 28 **Statistical Analysis**

29  
30  
31 Statistical analysis will be performed using SPSS version 23.0. Demographic and  
32  
33  
34 baseline characteristics will be compared using analysis of variance (ANOVA;  
35  
36  
37 continuous and ordinal data) or Chi-square tests (categorical data). A mixed-effects  
38  
39  
40 model with random intercepts and slopes will be used to detect any significant  
41  
42  
43 differences in the rate of change in motor outcomes and sensorimotor ERD among the  
44  
45  
46 three groups, because of its superiority in analyzing repeated measures data and dataset  
47  
48  
49 with missing values. Any factor with significant between-group difference in the  
50  
51  
52 baseline will be included in the mixed-effects model as covariates. Group effects, time  
53  
54  
55 effects, and group-by-time interaction effects will be included as fixed effects, and the  
56  
57  
58 random intercept and random slope of change in the dependent variables over time will  
59  
60

1  
2  
3  
4 be included as random effects. Between-group differences will be investigated using  
5  
6  
7 the interaction effects. Maximum likelihood estimation will be chosen as the estimation  
8  
9  
10 method. The covariance structure is assumed to be unstructured. The level of  
11  
12  
13 significance will be set at  $p < 0.05$ . For post-hoc comparisons, the level of significance  
14  
15  
16 will be set at  $p < 0.017$  after Bonferroni adjustment ( $0.05/3$ ;  $n =$  number of comparisons),  
17  
18  
19 for the comparison of interaction effects. Cohen's  $d$  will be calculated to determine the  
20  
21  
22 effect size of the change scores for the behavioral motor outcomes between groups.  
23  
24  
25 Immediate training effects (data from baseline to post-training) and the durability of  
26  
27  
28 training effects (data from post-training to follow-up) will be separately investigated  
29  
30  
31 with mixed-effect models. Frequency scores for each reported side effect and the  
32  
33  
34 percentage of participants who pass the MCID of the FMA-UE and ARAT will be  
35  
36  
37 compared using Chi-squared tests between the three groups.  
38  
39  
40  
41  
42

### 43 **Patient and public involvement**

44  
45  
46 Patients will be invited to participate in this study via advertisements. Several self-help  
47  
48  
49 stroke organizations will be notified in order to promote the enrollment. The results of  
50  
51  
52 the evaluation can be released to participants upon request.  
53  
54  
55  
56  
57

### 58 **Ethics and dissemination**

1  
2  
3  
4 This randomized controlled trial was registered on 24 July 2019  
5  
6  
7 (<https://clinicaltrials.gov>, see supplementary section for trial registration data). The  
8  
9  
10 study has launched on 9th September 2019 and will continue for around a year. The  
11  
12  
13 study will be conducted in accordance with the principles of the Declaration of Helsinki.  
14  
15  
16 Written informed consent forms will be collected from each participant before the study  
17  
18  
19 begins (see a template of written consent form in supplementary section). Ethical  
20  
21  
22 consideration has been approved from the human subject ethics subcommittee of the  
23  
24  
25 Hong Kong Polytechnic University. Any modifications to this study protocol will also  
26  
27  
28 be reviewed by the subcommittee. This study will only include participants who have  
29  
30  
31 given informed written consent and the confidentiality is assured. All original data will  
32  
33  
34 be kept in strictly private. During the study, written data will be stored in a safe place;  
35  
36  
37 after the study, all data will be input to a computer by the principle investigator and a  
38  
39  
40 backup of the data will be kept on a hard drive, which will be stored in a safe place.  
41  
42  
43 The input data will be double checked by another research assistant. Personal data will  
44  
45  
46 be discarded after three years. Due to the small expected sample size of this proof-of-  
47  
48  
49 concept study, a data monitoring committee was not deemed to be required and we will  
50  
51  
52 perform interim analyses when 50% of patients have been included and have completed  
53  
54  
55 the follow-up assessment. . The results of this study will be presented at international  
56  
57  
58 conferences and sent to a peer-reviewed journal to be considered for publication.  
59  
60

1  
2  
3  
4  
5  
6  
7 **Authors' contributions:** JZ and KF were involved in the conception and design of the  
8  
9  
10 research. JZ wrote up the first draft of the research. KF reviewed and edited the  
11  
12  
13 manuscript. JZ and KF approved the submission of the final version of the manuscript.  
14  
15

16  
17  
18  
19 **Funding:** This research receives no specific grant from any funding agency in the  
20  
21  
22 public, commercial, or not-for-profit sectors. Work of JZ was supported by PhD  
23  
24  
25 studentships of The Hong Kong Polytechnic University.  
26  
27

28  
29  
30  
31 **Conflict of interests:** None declared  
32  
33

34  
35  
36  
37 **Patient consent for publication:** Not required.  
38  
39

#### 40 41 42 43 **ORCID:**

44  
45  
46 Jack Jiaqi ZHANG: 0000-0002-4656-1909  
47

48  
49 Kenneth N.K. FONG: 0000-0001-5909-4847  
50  
51

#### 52 53 54 **References**

55  
56  
57  
58 1. Fiscaro F, Lanza G, Grasso AA, et al. Repetitive transcranial magnetic stimulation  
59  
60

- 1  
2  
3  
4 in stroke rehabilitation: review of the current evidence and pitfalls. *Ther Adv*  
5  
6  
7 *Neurol Disord* 2019;12:1756286419878317-17.  
8  
9
- 10 2. Rossi S, Hallett M, Rossini PM, et al. Safety, ethical considerations, and application  
11  
12  
13 guidelines for the use of transcranial magnetic stimulation in clinical practice  
14  
15  
16 and research. *Clinical neurophysiology : official journal of the International*  
17  
18  
19 *Federation of Clinical Neurophysiology* 2009;120(12):2008-39.  
20  
21
- 22 3. Suppa A, Huang YZ, Funke K, et al. Ten Years of Theta Burst Stimulation in Humans:  
23  
24  
25 Established Knowledge, Unknowns and Prospects. *Brain Stimul* 2016;9(3):323-  
26  
27  
28 35.  
29  
30
- 31 4. Huang Y-Z, Rothwell JC. The effect of short-duration bursts of high-frequency, low-  
32  
33  
34 intensity transcranial magnetic stimulation on the human motor cortex. *Clinical*  
35  
36  
37 *neurophysiology : official journal of the International Federation of Clinical*  
38  
39  
40 *Neurophysiology* 2004;115(5):1069-75.  
41  
42
- 43 5. Chen Y-J, Huang Y-Z, Chen C-Y, et al. Intermittent theta burst stimulation enhances  
44  
45  
46 upper limb motor function in patients with chronic stroke: a pilot randomized  
47  
48  
49 controlled trial. *BMC Neurol* 2019;19(1):69-69.  
50  
51
- 52 6. Hsu Y-F, Huang Y-Z, Lin Y-Y, et al. Intermittent theta burst stimulation over  
53  
54  
55 ipsilesional primary motor cortex of subacute ischemic stroke patients: a pilot  
56  
57  
58 study. *Brain Stimul* 2013;6(2):166-74.  
59  
60



- 1  
2  
3  
4 7. Talelli P, Wallace A, Dileone M, et al. Theta burst stimulation in the rehabilitation  
5  
6  
7 of the upper limb: a semirandomized, placebo-controlled trial in chronic stroke  
8  
9  
10 patients. *Neurorehabil Neural Repair* 2012;26(8):976-87.  
11  
12
- 13 8. Talelli P, Greenwood RJ, Rothwell JC. Exploring Theta Burst Stimulation as an  
14  
15  
16 intervention to improve motor recovery in chronic stroke. *Clinical*  
17  
18  
19 *neurophysiology : official journal of the International Federation of Clinical*  
20  
21  
22 *Neurophysiology* 2007;118(2):333-42.  
23  
24
- 25 9. Chung SW, Hill AT, Rogasch NC, et al. Use of theta-burst stimulation in changing  
26  
27  
28 excitability of motor cortex: A systematic review and meta-analysis. *Neurosci*  
29  
30  
31 *Biobehav Rev* 2016;63:43-64.  
32  
33
- 34 10. Watanabe K, Kudo Y, Sugawara E, et al. Comparative study of ipsilesional and  
35  
36  
37 contralesional repetitive transcranial magnetic stimulations for acute infarction.  
38  
39  
40 *J Neurol Sci* 2018;384:10-14.  
41  
42
- 43 11. Ackerley SJ, Byblow WD, Barber PA, et al. Primed Physical Therapy Enhances  
44  
45  
46 Recovery of Upper Limb Function in Chronic Stroke Patients. *Neurorehabil*  
47  
48  
49 *Neural Repair* 2016;30(4):339-48.  
50  
51
- 52 12. Sung W-H, Wang C-P, Chou C-L, et al. Efficacy of coupling inhibitory and  
53  
54  
55 facilitatory repetitive transcranial magnetic stimulation to enhance motor  
56  
57  
58 recovery in hemiplegic stroke patients. *Stroke* 2013;44(5):1375-82.  
59  
60

- 1  
2  
3  
4 13. Ackerley SJ, Stinear CM, Barber PA, et al. Priming sensorimotor cortex to enhance  
5  
6  
7 task-specific training after subcortical stroke. *Clinical neurophysiology* :  
8  
9  
10 *official journal of the International Federation of Clinical Neurophysiology*  
11  
12  
13 2014;125(7):1451-58.  
14  
15  
16 14. Meehan SK, Dao E, Lindsell MA, et al. Continuous theta burst stimulation over the  
17  
18  
19 contralesional sensory and motor cortex enhances motor learning post-stroke.  
20  
21  
22 *Neurosci Lett* 2011;500(1):26-30.  
23  
24  
25 15. Zhang L, Xing G, Fan Y, et al. Short- and Long-term Effects of Repetitive  
26  
27  
28 Transcranial Magnetic Stimulation on Upper Limb Motor Function after Stroke:  
29  
30  
31 a Systematic Review and Meta-Analysis. *Clin Rehabil* 2017;31(9):1137-53.  
32  
33  
34 16. Schilberg L, Schuhmann T, Sack AT. Interindividual Variability and Intraindividual  
35  
36  
37 Reliability of Intermittent Theta Burst Stimulation-induced Neuroplasticity  
38  
39  
40 Mechanisms in the Healthy Brain. *J Cogn Neurosci* 2017;29(6):1022-32.  
41  
42  
43 17. Vernet M, Bashir S, Yoo W-K, et al. Reproducibility of the effects of theta burst  
44  
45  
46 stimulation on motor cortical plasticity in healthy participants. *Clinical*  
47  
48  
49 *neurophysiology : official journal of the International Federation of Clinical*  
50  
51  
52 *Neurophysiology* 2014;125(2):320-26.  
53  
54  
55 18. Goldsworthy MR, Müller-Dahlhaus F, Ridding MC, et al. Inter-subject variability  
56  
57  
58 of LTD-like plasticity in human motor cortex: a matter of preceding motor  
59  
60

- 1  
2  
3  
4 activation. *Brain Stimul* 2014;7(6):864-70.  
5  
6  
7 19. Cassidy JM, Gillick BT, Carey JR. Priming the brain to capitalize on metaplasticity  
8  
9  
10 in stroke rehabilitation. *Phys Ther* 2014;94(1):139-50.  
11  
12  
13 20. Hassanzahraee M, Zoghi M, Jaberzadeh S. How different priming stimulations  
14  
15  
16 affect the corticospinal excitability induced by noninvasive brain stimulation  
17  
18  
19 techniques: a systematic review and meta-analysis. *Rev Neurosci*  
20  
21  
22 2018;29(8):883-99.  
23  
24  
25 21. Opie GM, Vosnakis E, Ridding MC, et al. Priming theta burst stimulation enhances  
26  
27  
28 motor cortex plasticity in young but not old adults. *Brain Stimul*  
29  
30  
31 2017;10(2):298-304.  
32  
33  
34 22. Mastroeni C, Bergmann TO, Rizzo V, et al. Brain-derived neurotrophic factor--a  
35  
36  
37 major player in stimulation-induced homeostatic metaplasticity of human motor  
38  
39  
40 cortex? *PLoS One* 2013;8(2):e57957-e57.  
41  
42  
43 23. Murakami T, Müller-Dahlhaus F, Lu M-K, et al. Homeostatic metaplasticity of  
44  
45  
46 corticospinal excitatory and intracortical inhibitory neural circuits in human  
47  
48  
49 motor cortex. *The Journal of physiology* 2012;590(22):5765-81.  
50  
51  
52 24. Concerto C, Lanza G, Cantone M, et al. Repetitive transcranial magnetic stimulation  
53  
54  
55 in patients with drug-resistant major depression: A six-month clinical follow-  
56  
57  
58 up study. *Int J Psychiatry Clin Pract* 2015;19(4):252-58.  
59  
60

- 1  
2  
3  
4 25. Iyer MB, Schleper N, Wassermann EM. Priming stimulation enhances the  
5  
6  
7 depressant effect of low-frequency repetitive transcranial magnetic stimulation.  
8  
9  
10 *The Journal of neuroscience : the official journal of the Society for*  
11  
12  
13 *Neuroscience* 2003;23(34):10867-72.  
14  
15  
16 26. Boyd LA, Hayward KS, Ward NS, et al. Biomarkers of Stroke Recovery:  
17  
18  
19 Consensus-Based Core Recommendations from the Stroke Recovery and  
20  
21  
22 Rehabilitation Roundtable. *Neurorehabil Neural Repair* 2017;31(10-11):864-  
23  
24  
25 76.  
26  
27  
28 27. Neuper C, Wörtz M, Pfurtscheller G. ERD/ERS patterns reflecting sensorimotor  
29  
30  
31 activation and deactivation. *Prog Brain Res* 2006;159:211-22.  
32  
33  
34 28. Shiner CT, Tang H, Johnson BW, et al. Cortical beta oscillations and motor  
35  
36  
37 thresholds differ across the spectrum of post-stroke motor impairment, a  
38  
39  
40 preliminary MEG and TMS study. *Brain Res* 2015;1629:26-37.  
41  
42  
43 29. Rossiter HE, Boudrias M-H, Ward NS. Do movement-related beta oscillations  
44  
45  
46 change after stroke? *J Neurophysiol* 2014;112(9):2053-58.  
47  
48  
49 30. Bartur G, Pratt H, Frenkel-Toledo S, et al. Neurophysiological effects of mirror  
50  
51  
52 visual feedback in stroke patients with unilateral hemispheric damage. *Brain*  
53  
54  
55 *Res* 2018;1700:170-80.  
56  
57  
58 31. Bartur G, Pratt H, Dickstein R, et al. Electrophysiological manifestations of mirror  
59  
60

- 1  
2  
3  
4 visual feedback during manual movement. *Brain Res* 2015;1606:113-24.  
5  
6  
7 32. Zhang JJ, Fong KNK. Enhancing mirror visual feedback with intermittent theta  
8  
9 burst stimulation in healthy adults. *Restor Neurol Neurosci* 2019;37(5):483-95.  
10  
11  
12  
13 33. Dionísio A, Gouveia R, Duarte IC, et al. Continuous theta burst stimulation  
14  
15 increases contralateral mu and beta rhythms with arm elevation: implications  
16  
17 for neurorehabilitation. *Journal of neural transmission (Vienna, Austria : 1996)*  
18  
19 2020;127(1):17-25.  
20  
21  
22  
23  
24  
25 34. Tremblay S, Rogasch NC, Premoli I, et al. Clinical utility and prospective of TMS–  
26  
27 EEG. *Clin Neurophysiol* 2019;130(5):802-44.  
28  
29  
30  
31 35. Chan A-W, Tetzlaff JM, Altman DG, et al. SPIRIT 2013 statement: defining  
32  
33 standard protocol items for clinical trials. *Ann Intern Med* 2013;158(3):200-07.  
34  
35  
36  
37 36. Bernhardt J, Hayward KS, Kwakkel G, et al. Agreed definitions and a shared vision  
38  
39 for new standards in stroke recovery research: The Stroke Recovery and  
40  
41 Rehabilitation Roundtable taskforce. *International journal of stroke : official*  
42  
43 *journal of the International Stroke Society* 2017;12(5):444-50.  
44  
45  
46  
47  
48  
49 37. Fong K, Ng B, Chan D, et al. Development of the Hong Kong Version of the  
50  
51 Functional Test for the Hemiplegic Upper Extremity (FTHUE-HK). *Hong Kong*  
52  
53 *Journal of Occupational Therapy* 2004;14(1):21-29.  
54  
55  
56  
57  
58 38. Jin M, Zhang Z, Bai Z, et al. Timing-dependent interaction effects of tDCS with  
59  
60

- 1  
2  
3  
4 mirror therapy on upper extremity motor recovery in patients with chronic  
5  
6  
7 stroke: A randomized controlled pilot study. *J Neurol Sci* 2019;405:116436.  
8  
9
- 10 39. Fong KN, Lo PC, Yu YS, et al. Effects of Sensory Cueing on Voluntary Arm Use  
11  
12 for Patients With Chronic Stroke: A Preliminary Study. *Arch Phys Med Rehabil*  
13  
14 2011;92(1):15-23.  
15  
16  
17  
18
- 19 40. Chu L, Pei C, Ho M, et al. Validation of the Abbreviated Mental Test (Hong Kong  
20  
21 version) in the elderly medical patient. *Hong Kong Med J* 1995;1(3):207-11.  
22  
23  
24
- 25 41. Bohannon RW, Smith MB. Interrater reliability of a modified Ashworth scale of  
26  
27 muscle spasticity. *Phys Ther* 1987;67(2):206-07.  
28  
29
- 30 42. Zigmond AS, Snaith RP. The Hospital Anxiety and Depression Scale.  
31  
32 1983;67(6):361-70.  
33  
34  
35  
36
- 37 43. Jensen CV. A computer program for randomizing patients with near-even  
38  
39 distribution of important parameters. *Computers and biomedical research, an*  
40  
41 *international journal* 1991;24(5):429-34.  
42  
43  
44  
45
- 46 44. Qian Q, Nam Y, Guo Z, et al. Distal versus proximal - an investigation on different  
47  
48 supportive strategies by robots for upper limb rehabilitation after stroke: a  
49  
50 randomized controlled trial. *J Neuroeng Rehabil* 2019;16  
51  
52  
53
- 54 45. Hu X, Tong RK-Y, Ho S, et al. Wrist Rehabilitation Assisted by an  
55  
56 Electromyography-Driven Neuromuscular Electrical Stimulation Robot After  
57  
58  
59  
60

- 1  
2  
3  
4 Stroke. *Neurorehabil Neural Repair* 2014;29  
5  
6  
7 46. Dieler AC, Dresler T, Joachim K, et al. Can intermittent theta burst stimulation as  
8  
9  
10 add-on to psychotherapy improve nicotine abstinence? Results from a pilot  
11  
12  
13 study. *Eur Addict Res* 2014;20(5):248-53.  
14  
15  
16 47. Kwakkel G, Lannin NA, Borschmann K, et al. Standardized measurement of  
17  
18  
19 sensorimotor recovery in stroke trials: Consensus-based core recommendations  
20  
21  
22 from the Stroke Recovery and Rehabilitation Roundtable. *International journal*  
23  
24  
25 *of stroke : official journal of the International Stroke Society* 2017;12(5):451-  
26  
27  
28 61.  
29  
30  
31 48. Page SJ, Levine P, Hade E. Psychometric properties and administration of the  
32  
33  
34 wrist/hand subscales of the Fugl-Meyer Assessment in minimally impaired  
35  
36  
37 upper extremity hemiparesis in stroke. *Arch Phys Med Rehabil*  
38  
39  
40 2012;93(12):2373-6.e5.  
41  
42  
43 49. van der Lee JH, de Groot V, Beckerman H, et al. The intra- and interrater reliability  
44  
45  
46 of the action research arm test: A practical test of upper extremity function in  
47  
48  
49 patients with stroke. *Arch Phys Med Rehabil* 2001;82(1):14-19.  
50  
51  
52 50. Chan IHL, Fong KNK, Chan DYL, et al. Effects of Arm Weight Support Training  
53  
54  
55 to Promote Recovery of Upper Limb Function for Subacute Patients after Stroke  
56  
57  
58 with Different Levels of Arm Impairments. *BioMed research international*  
59  
60

1  
2  
3  
4 2016;2016:9346374-74.  
5  
6

7 51. Rossiter HE, Borrelli MR, Borchert RJ, et al. Cortical mechanisms of mirror therapy  
8  
9 after stroke. *Neurorehabil Neural Repair* 2015;29(5):444-52.  
10  
11

12  
13 52. Lee H-M, Li P-C, Fan S-C. Delayed mirror visual feedback presented using a novel  
14  
15 mirror therapy system enhances cortical activation in healthy adults. *J Neuroeng*  
16  
17  
18  
19  
20  
21  
22  
23  
24  
25  
26  
27  
28  
29  
30  
31  
32  
33  
34  
35  
36  
37  
38  
39  
40  
41  
42  
43  
44  
45  
46  
47  
48  
49  
50  
51  
52  
53  
54  
55  
56  
57  
58  
59  
60  
*Rehabil* 2015;12(1):56.

53. Delorme A, Makeig S. EEGLAB: an open source toolbox for analysis of single-  
trial EEG dynamics including independent component analysis. *J Neurosci*  
*Methods* 2004;134(1):9-21.

54. Makeig S. Auditory event-related dynamics of the EEG spectrum and effects of  
exposure to tones. *Electroencephalogr Clin Neurophysiol* 1993;86(4):283-93.

55. Fong KN, Ting KH, Chan CC, et al. Mirror therapy with bilateral arm training for  
hemiplegic upper extremity motor functions in patients with chronic stroke.  
*Hong Kong medical journal = Xianggang yi xue za zhi* 2019;25 Suppl 3(1):30-  
34.



## Figure Legends

Figure 1. A demonstration of RAT.

\*Note: The persons depicted are not patient and were taken with the participants knowledge.

Figure 2. Flowchart of the proposed randomized controlled trial.

Figure 3. Schedule of participant recruitment, assessments, and intervention.

Abbreviation: iTBS: intermittent theta burst stimulation; RAT: robot-assisted training;

FMA-UE: Fugl-Meyer Assessment-Upper Extremity scores; ARAT: action research arm test; EEG: electroencephalography.

1  
2  
3  
4  
5  
6  
7  
8  
9  
10  
11  
12  
13  
14  
15  
16  
17  
18  
19  
20  
21  
22  
23  
24  
25  
26  
27  
28  
29  
30  
31  
32  
33  
34  
35  
36  
37  
38  
39  
40  
41  
42  
43  
44  
45  
46  
47  
48  
49  
50  
51  
52  
53  
54  
55  
56  
57  
58  
59  
60

For peer review only

1  
2  
3  
4  
5  
6  
7  
8  
9  
10  
11  
12  
13  
14  
15  
16  
17  
18  
19  
20  
21  
22  
23  
24  
25  
26  
27  
28  
29  
30  
31  
32  
33  
34  
35  
36  
37  
38  
39  
40  
41  
42  
43  
44  
45  
46  
47  
48  
49  
50  
51  
52  
53  
54  
55  
56  
57  
58  
59  
60

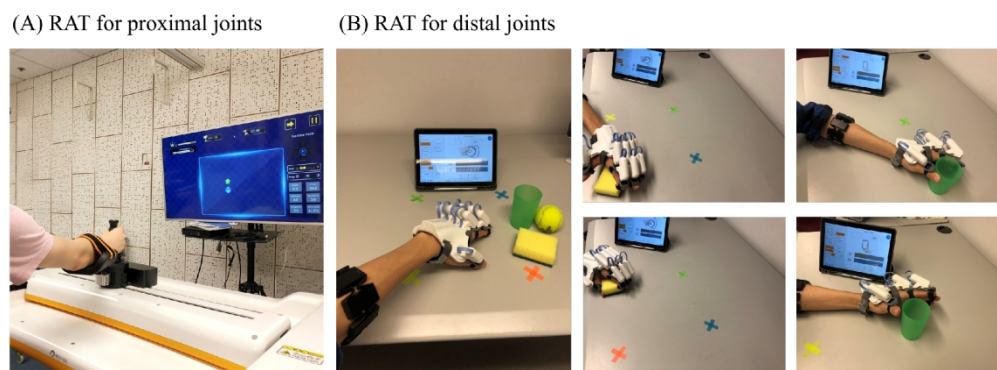

Figure 1. A demonstration of RAT. \*Note The persons depicted are not patient and were taken with the participants knowledge.

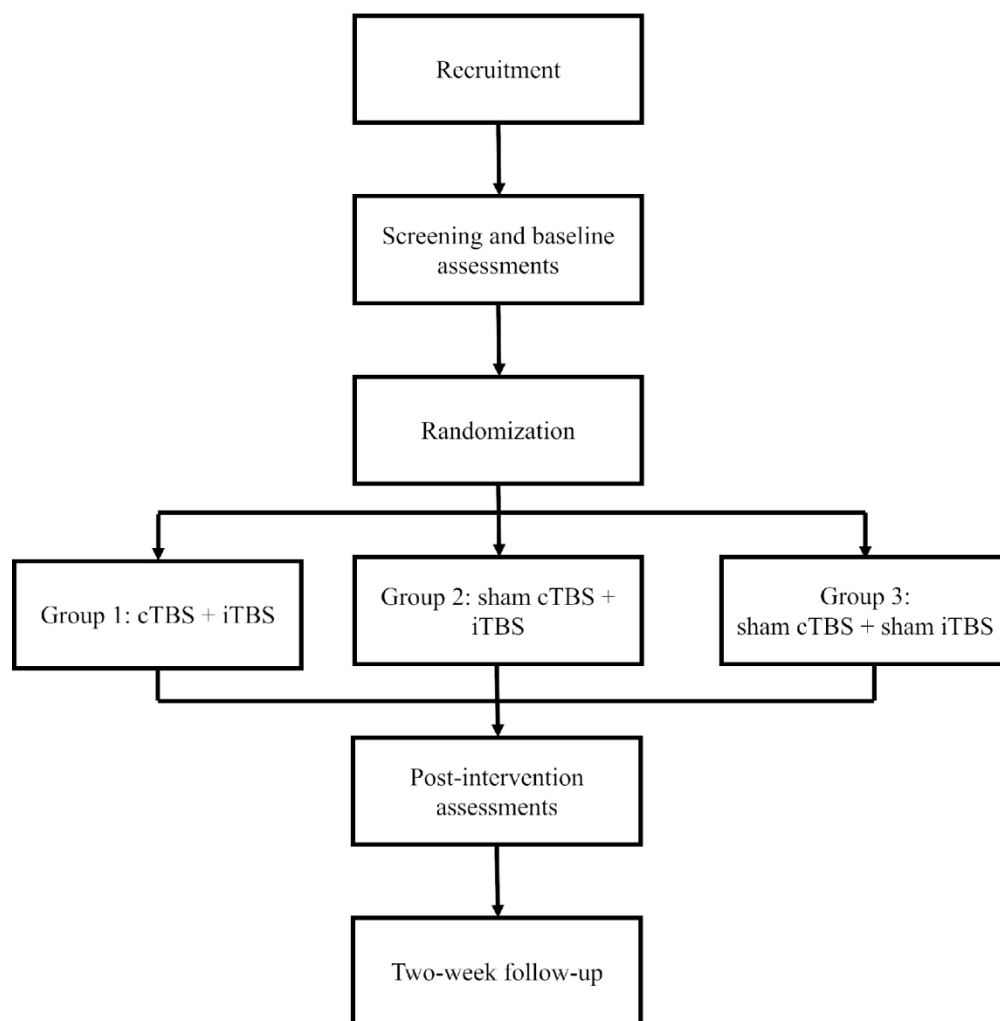

39 Figure 2. Flowchart of the proposed randomized controlled trial.

| Timepoint                                        | -T1<br>(Screening) | T0<br>(Baseline) | T1<br>(Mid) | T2<br>(Post) | T3<br>(Follow-up) |
|--------------------------------------------------|--------------------|------------------|-------------|--------------|-------------------|
| Recruitment                                      | X                  |                  |             |              |                   |
| Eligibility screening                            | X                  |                  |             |              |                   |
| Informed consent                                 | X                  |                  |             |              |                   |
| <b>Randomization</b>                             |                    | X                |             |              |                   |
| <b>Intervention</b>                              |                    |                  |             |              |                   |
| Group 1: cTBS + iTBS combined with RAT           |                    |                  |             |              |                   |
| Group 2: sham cTBS + iTBS combined with RAT      |                    |                  |             |              |                   |
| Group 3: Sham cTBS + sham iTBS combined with RAT |                    |                  |             |              |                   |
| <b>Assessments</b>                               |                    |                  |             |              |                   |
| FMA-UE                                           | X                  |                  | X           | X            | X                 |
| ARAT                                             | X                  |                  | X           | X            | X                 |
| Side-effects questionnaire                       |                    | X                | X           | X            |                   |
| Kinematic outcomes                               |                    | X                | X           | X            |                   |
| EEG                                              |                    | X                |             | X            |                   |

Figure 3. Schedule of participant recruitment, assessments, and intervention. Abbreviation: iTBS: intermittent theta burst stimulation; RAT: robot-assisted training; FMA-UE: Fugl-Meyer Assessment-Upper Extremity scores; ARAT: action research arm test; EEG: electroencephalography.

1  
2  
3  
4  
5  
6  
7  
8  
9  
10  
11  
12  
13  
14  
15  
16  
17  
18  
19  
20  
21  
22  
23  
24  
25  
26  
27  
28  
29  
30  
31  
32  
33  
34  
35  
36  
37  
38  
39  
40  
41  
42  
43  
44  
45  
46  
47  
48  
49  
50  
51  
52  
53  
54  
55  
56  
57  
58  
59  
60

*Supplementary Section*

**The Effects of Priming Intermittent Theta Burst Stimulation  
on Upper Limb Motor Recovery After Stroke: Study  
Protocol for a Proof-of-Concept Randomized Controlled Trial**

Jack Jiaqi ZHANG and Kenneth N.K. FONG

Department of Rehabilitation Sciences, The Hong Kong Polytechnic University,

Kowloon, Hong Kong SAR, China

|                                            |     |
|--------------------------------------------|-----|
| Table S1. Trial registration data          | 2-5 |
| Appendix: Template of written consent form | 6-9 |

**Table S1. Trial registration data**

| Data category                                 | Information                                                                                                                                                                                                         |
|-----------------------------------------------|---------------------------------------------------------------------------------------------------------------------------------------------------------------------------------------------------------------------|
| Primary registry and trial identifying number | ClinicalTrials.gov<br>NCT04034069                                                                                                                                                                                   |
| Date of registration in primary registry      | First posted: July 26, 2019<br>Late Update: October 18, 2019                                                                                                                                                        |
| Secondary identifying numbers                 | HSEARS20190718003                                                                                                                                                                                                   |
| Source(s) of monetary or material support     | The Hong Kong Polytechnic University<br>Department of Rehabilitation Sciences                                                                                                                                       |
| Primary sponsor                               | The Hong Kong Polytechnic University<br>Department of Rehabilitation Sciences                                                                                                                                       |
| Secondary sponsor(s)                          | No applicable                                                                                                                                                                                                       |
| Contact for public queries                    | Jack Jiaqi ZHANG, MSc<br>Email: <a href="mailto:17902718r@connect.polyu.hk">17902718r@connect.polyu.hk</a>                                                                                                          |
| Contact for scientific queries                | Jack Jiaqi ZHANG, MSc<br>Email: <a href="mailto:17902718r@connect.polyu.hk">17902718r@connect.polyu.hk</a><br><br>Kenneth N.K. FONG, PhD<br>Email: <a href="mailto:rsnkfong@polyu.edu.hk">rsnkfong@polyu.edu.hk</a> |

|                                           |                                                                                                          |
|-------------------------------------------|----------------------------------------------------------------------------------------------------------|
| Public title                              | The Effects of Priming Intermittent Theta Burst Stimulation on Upper Limb Motor Recovery After Stroke    |
| Scientific title                          | The Effects of Priming Intermittent Theta Burst Stimulation on Upper Limb Motor Recovery After Stroke    |
| Countries of recruitment                  | Hong Kong SAR, China                                                                                     |
| Health condition(s) or problem(s) studied | Stroke                                                                                                   |
| Intervention(s)                           | Active comparator: cTBS + iTBS, in addition to robot-assisted training                                   |
|                                           | Active comparator: Sham cTBS + iTBS, in addition to robot-assisted training                              |
|                                           | Placebo comparator: Sham cTBS + sham iTBS, in addition to robot-assisted training                        |
| Key inclusion and exclusion criteria      | Ages eligible for study: 18-64 years<br>Sexes eligible for study: both<br>Accepts healthy volunteers: no |
|                                           | Inclusion criteria: Chronic stroke patients ( $\geq 6$                                                   |



|                         |                                                                                                                                                                                                                                                                                                        |
|-------------------------|--------------------------------------------------------------------------------------------------------------------------------------------------------------------------------------------------------------------------------------------------------------------------------------------------------|
|                         | <p>months after stroke onset), with upper limb impairment (FTUHK from 2 to 7).</p> <p>Exclusion criteria: Not free of TMS contraindications; primary neurological disease excluding stroke, notable cognitive impairment (AMT &lt; 6), extreme spasticity in anyhemiplegic upper limb (MAS &gt; 2)</p> |
| Study type              | <p>Interventional</p> <p>Allocation: randomized intervention model.</p> <p>Parallel assignment masking: single-blinded (outcomes assessor)</p> <p>Primary purpose: intervention</p>                                                                                                                    |
| Date of first enrolment | September 2019                                                                                                                                                                                                                                                                                         |
| Target sample size      | 36                                                                                                                                                                                                                                                                                                     |
| Recruitment status      | Recruiting                                                                                                                                                                                                                                                                                             |
| Primary outcome(s)      | FMA-UE and ARAT                                                                                                                                                                                                                                                                                        |
| Key secondary outcomes  | Kinematic metrics (i.e., size of active range of motion, mean velocity, hand path ratio)                                                                                                                                                                                                               |

1  
2  
3  
4 Abbreviations: cTBS: Continuous Theta Burst Stimulation; iTBS: Intermittent Theta

5  
6  
7 Burst Stimulation; AMT: Abbreviated Mental Test; MAS: Modified Ashworth Scale;

8  
9  
10 FMA-UE: Fugl-Meyer Assessment - Upper Extremity Scores; ARAT: Action Research

11  
12  
13 Arm Test  
14  
15  
16  
17  
18  
19  
20  
21  
22  
23  
24  
25  
26  
27  
28  
29  
30  
31  
32  
33  
34  
35  
36  
37  
38  
39  
40  
41  
42  
43  
44  
45  
46  
47  
48  
49  
50  
51  
52  
53  
54  
55  
56  
57  
58  
59  
60

For peer review only

## Appendix: Template of written consent form

### Research Consent Form The Hong Kong Polytechnic University Department of Rehabilitation Sciences

#### **Title of research project:**

The Effects of Priming Intermittent Theta Burst Stimulation (iTBS) on Upper Limb Motor Recovery After Stroke: A Randomized Controlled Trial

#### **Research setting:**

Department of Rehabilitation Sciences, The Hong Kong Polytechnic University

#### **Research investigator:**

Mr. Jack Jiaqi Zhang (PhD candidate, Department of Rehabilitation Sciences, The Hong Kong Polytechnic University)

Dr. Kenneth N.K. Fong (Associate Professor, Department of Rehabilitation Sciences, The Hong Kong Polytechnic University)

The purpose of this study is to investigate whether priming iTBS can enhance the therapeutic response to robot-assisted training for rehabilitating the hemiplegic upper limb functions in stroke patients. Participants need complete 10 training sessions. During each training session, participants will receive two sessions of transcranial magnetic stimulation in a form of theta burst stimulation (TBS). Immediately after the brain stimulation, participants will perform motor training assisted by robotic devices. Assessment for hemiplegic upper limb functions will be conducted in baseline, after 5-session, after 10-session and two weeks follow up. Some participants will be invited to join EEG examinations

#### **Benefits for participants and society**

The study will provide preliminary evidence of the effect of priming iTBS on stroke rehabilitation and its neural mechanisms. By participating in this study, you can receive several sessions of upper limb motor training and you do not have to pay any additional research-related payment. After the completion of 10-session of training, you will receive a transportation allowance of HK\$100. For participants who join the EEG examinations, additional HK\$400 will be paid as a compensation of time.

### **Potential risks**

Although TBS is safe for most people, there may be unnecessary risks for some people. We need screen whether the participants have implanted metal objects, such as cardiac pacemakers, surgical aneurysm stents, artificial cochlear implants, or pregnancy. Before TBS, the participants should remove all metal objects on the body, such as hearing aids, dentures, orthopedic frames, watches, glasses, jewelry, any metal object on clothes, etc. In addition, it is very rare that TBS may induce seizure. Participants with a seizure/epilepsy history will not be included for this study. Other adverse effects include mild headaches and discomfort, mild cognitive or psychiatric symptoms (mild depression or mania). When strictly following the safety guidelines, those adverse effects are extremely rare.

### **Data confidentiality**

Every participant has the right to obtain his or her personal data and publicly reported research results, if needed. According to the Law in Hong Kong (in particular the Personal Data (Privacy) Ordinance, Chapter 486), you have the right to keep your personal data confidential, such as any collection, storage, reservation, management, control and use (analysis/comparison) regarding the personal data. The information will not be transferred in Hong Kong and other places. If you have any questions, you can consult the Office of the Privacy Commissioner for Personal Data or contact their office (telephone number: 2827 2827) to properly supervise or supervise your personal data protection so that you can fully understand the meaning of legal protection of privacy information.

After agreeing to participate in the study, you authorize the following:

- In order to monitor this study, you need authorize the principal investigator and his or her research team and research ethics committee to obtain, use and retain your personal data in the manner specified in this study and this consent form, and
- In order to check and verify the completeness of the research data and reach the consistency between research regulations and any relevant requirements, you need authorize relevant government agencies (such as the Hong Kong Department of Health, Hospital Authority) to obtain your personal data

### **Voluntary participation:**

Your participation in this research program is entirely voluntary. You may choose not to participate or may stop participating in this study at any time without any changes or loss of medical care that you accept now and in the future.

### **New information**

If there is any new information about the study that will affect your decision to continue participating in this study, you will be notified in first time. You will be notified during the study if there are significant changes in this study that can influence your health or your willingness to participate in the study. You may have to sign a new consent form to indicate that you have been informed of new information about the study.

### **Exit and termination of this study**

You are free to decide whether or not to participate in the study, and you may withdraw your consent at any time during the course of the study and withdraw from the study without giving any reason. It will not cause any unpleasantness or affect the medical care of your doctors in the future. The research principle investigator may also suspend the study when it is necessary. If no special request is made to destroy the data collected prior to the drop out, we will continue to use it. Participants will be given enough time to consider whether to participate in the study.

### **Study results**

The results of this study may be published in medical journals or at medical conferences. Information related to your identity will not appear in any publicly available reports related to this study.

### **Contact person**

If you need further information, you can contact the research investigators -- Mr. Jack Jiaqi ZHANG at 65261304 or Dr. Kenneth N.K. FONG, Department of Rehabilitation Sciences, Hong Kong Polytechnic University, 27666716.

If you have any questions about the rights enjoyed as a research participant, you can contact Ms. Chung (Secretary of the Research Committee of the Department of Rehabilitation Sciences, The Hong Kong Polytechnic University) at 27664329.

Your participation in this study will require you to sign and keep a copy of the consent form.

### Consent form

**Title of research project:** The Effects of Priming Intermittent Theta Burst Stimulation (iTBS) on Upper Limb Motor Recovery After Stroke: A Randomized Controlled Trial

1. I am sure that I have read and understood the information sheet of the above research study (and I have the opportunity to ask any question about this study).
2. I understand that some of my current medical records may be checked by researchers at the Hong Kong Polytechnic University. I therefore allow these researchers to check my records.
3. I agree to use the data collected in this study for stroke research. I allow the data yielded from this study to be used for publication. I understand that my identity will be treated confidentially. Any shared and published data will be completely anonymous, so I will not be identified.
4. I understand that my participation is voluntary, and I am free to withdraw at any time without any reason. The medical care or legal rights I accept now and, in the future, will not be affected.
5. My signature of this informed consent does not mean that I waive any legal rights.
6. I agree to participate in the above research projects.
7. I understand that I will get a copy of this consent form.

|                                 |           |      |
|---------------------------------|-----------|------|
| Participant name                | Signature | Date |
| Witness name<br>(If applicable) | Signature | Date |
| Researcher name                 | Signature | Date |

# Reporting checklist for protocol of a clinical trial.

Based on the SPIRIT guidelines.

## Instructions to authors

Complete this checklist by entering the page numbers from your manuscript where readers will find each of the items listed below.

Your article may not currently address all the items on the checklist. Please modify your text to include the missing information. If you are certain that an item does not apply, please write "n/a" and provide a short explanation.

Upload your completed checklist as an extra file when you submit to a journal.

In your methods section, say that you used the SPIRIT reporting guidelines, and cite them as:

Chan A-W, Tetzlaff JM, Altman DG, Laupacis A, Gøtzsche PC, Krleža-Jerić K, Hróbjartsson A, Mann H, Dickersin K, Berlin J, Doré C, Parulekar W, Summerskill W, Groves T, Schulz K, Sox H, Rockhold FW, Rennie D, Moher D. SPIRIT 2013 Statement: Defining standard protocol items for clinical trials. *Ann Intern Med.* 2013;158(3):200-207

Reporting Item

Page Number

### Administrative

#### information

| Reporting Item                                                                                                                               | Page Number |
|----------------------------------------------------------------------------------------------------------------------------------------------|-------------|
| <b>Title</b> <a href="#">#1</a> Descriptive title identifying the study design, population, interventions, and, if applicable, trial acronym | 1           |

|    |                     |                     |                                                          |               |
|----|---------------------|---------------------|----------------------------------------------------------|---------------|
| 1  | Trial registration  | <a href="#">#2a</a> | Trial identifier and registry name. If not yet           | 3             |
| 2  |                     |                     | registered, name of intended registry                    |               |
| 3  |                     |                     |                                                          |               |
| 4  |                     |                     |                                                          |               |
| 5  |                     |                     |                                                          |               |
| 6  | Trial registration: | <a href="#">#2b</a> | All items from the World Health Organization Trial       | Supplementary |
| 7  | data set            |                     | Registration Data Set                                    | section       |
| 8  |                     |                     |                                                          |               |
| 9  |                     |                     |                                                          |               |
| 10 |                     |                     |                                                          |               |
| 11 |                     |                     |                                                          | Table S1      |
| 12 |                     |                     |                                                          |               |
| 13 |                     |                     |                                                          |               |
| 14 |                     |                     |                                                          |               |
| 15 | Protocol version    | <a href="#">#3</a>  | Date and version identifier                              | Supplementary |
| 16 |                     |                     |                                                          | section       |
| 17 |                     |                     |                                                          |               |
| 18 |                     |                     |                                                          |               |
| 19 |                     |                     |                                                          |               |
| 20 |                     |                     |                                                          | Table S1      |
| 21 |                     |                     |                                                          |               |
| 22 |                     |                     |                                                          |               |
| 23 | Funding             | <a href="#">#4</a>  | Sources and types of financial, material, and other      | 26            |
| 24 |                     |                     | support                                                  |               |
| 25 |                     |                     |                                                          |               |
| 26 |                     |                     |                                                          |               |
| 27 |                     |                     |                                                          |               |
| 28 |                     |                     |                                                          |               |
| 29 | Roles and           | <a href="#">#5a</a> | Names, affiliations, and roles of protocol contributors  | 1; 26         |
| 30 | responsibilities:   |                     |                                                          |               |
| 31 |                     |                     |                                                          |               |
| 32 | contributorship     |                     |                                                          |               |
| 33 |                     |                     |                                                          |               |
| 34 |                     |                     |                                                          |               |
| 35 |                     |                     |                                                          |               |
| 36 | Roles and           | <a href="#">#5b</a> | Name and contact information for the trial sponsor       | Supplementary |
| 37 | responsibilities:   |                     |                                                          | section       |
| 38 |                     |                     |                                                          |               |
| 39 | sponsor contact     |                     |                                                          |               |
| 40 |                     |                     |                                                          |               |
| 41 |                     |                     |                                                          | Table S1      |
| 42 | information         |                     |                                                          |               |
| 43 |                     |                     |                                                          |               |
| 44 |                     |                     |                                                          |               |
| 45 |                     |                     |                                                          |               |
| 46 | Roles and           | <a href="#">#5c</a> | Role of study sponsor and funders, if any, in study      | Supplementary |
| 47 | responsibilities:   |                     | design; collection, management, analysis, and            | section       |
| 48 |                     |                     |                                                          |               |
| 49 | sponsor and funder  |                     | interpretation of data; writing of the report; and the   |               |
| 50 |                     |                     |                                                          | Table S1      |
| 51 |                     |                     |                                                          |               |
| 52 |                     |                     |                                                          |               |
| 53 |                     |                     | decision to submit the report for publication, including |               |
| 54 |                     |                     |                                                          |               |
| 55 |                     |                     | whether they will have ultimate authority over any of    |               |
| 56 |                     |                     |                                                          |               |
| 57 |                     |                     | these activities                                         |               |
| 58 |                     |                     |                                                          |               |
| 59 |                     |                     |                                                          |               |
| 60 |                     |                     |                                                          |               |



|    |                           |                     |                                                          |      |
|----|---------------------------|---------------------|----------------------------------------------------------|------|
| 1  | Roles and                 | <a href="#">#5d</a> | Composition, roles, and responsibilities of the          | NA   |
| 2  |                           |                     |                                                          |      |
| 3  | responsibilities:         |                     | coordinating centre, steering committee, endpoint        |      |
| 4  |                           |                     |                                                          |      |
| 5  | committees                |                     | adjudication committee, data management team, and        |      |
| 6  |                           |                     |                                                          |      |
| 7  |                           |                     | other individuals or groups overseeing the trial, if     |      |
| 8  |                           |                     |                                                          |      |
| 9  |                           |                     | applicable (see Item 21a for data monitoring             |      |
| 10 |                           |                     |                                                          |      |
| 11 |                           |                     | committee)                                               |      |
| 12 |                           |                     |                                                          |      |
| 13 |                           |                     |                                                          |      |
| 14 |                           |                     |                                                          |      |
| 15 | <b>Introduction</b>       |                     |                                                          |      |
| 16 |                           |                     |                                                          |      |
| 17 |                           |                     |                                                          |      |
| 18 |                           |                     |                                                          |      |
| 19 | Background and            | <a href="#">#6a</a> | Description of research question and justification for   | 1-9  |
| 20 |                           |                     |                                                          |      |
| 21 | rationale                 |                     | undertaking the trial, including summary of relevant     |      |
| 22 |                           |                     |                                                          |      |
| 23 |                           |                     | studies (published and unpublished) examining            |      |
| 24 |                           |                     |                                                          |      |
| 25 |                           |                     | benefits and harms for each intervention                 |      |
| 26 |                           |                     |                                                          |      |
| 27 |                           |                     |                                                          |      |
| 28 |                           |                     |                                                          |      |
| 29 | Background and            | <a href="#">#6b</a> | Explanation for choice of comparators                    | 9    |
| 30 |                           |                     |                                                          |      |
| 31 | rationale: choice of      |                     |                                                          |      |
| 32 |                           |                     |                                                          |      |
| 33 | comparators               |                     |                                                          |      |
| 34 |                           |                     |                                                          |      |
| 35 |                           |                     |                                                          |      |
| 36 | Objectives                | <a href="#">#7</a>  | Specific objectives or hypotheses                        | 9    |
| 37 |                           |                     |                                                          |      |
| 38 |                           |                     |                                                          |      |
| 39 | Trial design              | <a href="#">#8</a>  | Description of trial design including type of trial (eg, | 9-10 |
| 40 |                           |                     |                                                          |      |
| 41 |                           |                     | parallel group, crossover, factorial, single group),     |      |
| 42 |                           |                     |                                                          |      |
| 43 |                           |                     | allocation ratio, and framework (eg, superiority,        |      |
| 44 |                           |                     |                                                          |      |
| 45 |                           |                     | equivalence, non-inferiority, exploratory)               |      |
| 46 |                           |                     |                                                          |      |
| 47 |                           |                     |                                                          |      |
| 48 |                           |                     |                                                          |      |
| 49 | <b>Methods:</b>           |                     |                                                          |      |
| 50 |                           |                     |                                                          |      |
| 51 | <b>Participants,</b>      |                     |                                                          |      |
| 52 |                           |                     |                                                          |      |
| 53 | <b>interventions, and</b> |                     |                                                          |      |
| 54 |                           |                     |                                                          |      |
| 55 | <b>outcomes</b>           |                     |                                                          |      |
| 56 |                           |                     |                                                          |      |
| 57 |                           |                     |                                                          |      |
| 58 |                           |                     |                                                          |      |
| 59 |                           |                     |                                                          |      |
| 60 |                           |                     |                                                          |      |

|    |                      |                      |                                                        |       |
|----|----------------------|----------------------|--------------------------------------------------------|-------|
| 1  | Study setting        | <a href="#">#9</a>   | Description of study settings (eg, community clinic,   | 10    |
| 2  |                      |                      | academic hospital) and list of countries where data    |       |
| 3  |                      |                      | will be collected. Reference to where list of study    |       |
| 4  |                      |                      | sites can be obtained                                  |       |
| 5  |                      |                      |                                                        |       |
| 6  |                      |                      |                                                        |       |
| 7  |                      |                      |                                                        |       |
| 8  |                      |                      |                                                        |       |
| 9  |                      |                      |                                                        |       |
| 10 |                      |                      |                                                        |       |
| 11 | Eligibility criteria | <a href="#">#10</a>  | Inclusion and exclusion criteria for participants. If  | 10-11 |
| 12 |                      |                      | applicable, eligibility criteria for study centres and |       |
| 13 |                      |                      | individuals who will perform the interventions (eg,    |       |
| 14 |                      |                      | surgeons, psychotherapists)                            |       |
| 15 |                      |                      |                                                        |       |
| 16 |                      |                      |                                                        |       |
| 17 |                      |                      |                                                        |       |
| 18 |                      |                      |                                                        |       |
| 19 |                      |                      |                                                        |       |
| 20 |                      |                      |                                                        |       |
| 21 | Interventions:       | <a href="#">#11a</a> | Interventions for each group with sufficient detail to | 14-18 |
| 22 |                      |                      | allow replication, including how and when they will be |       |
| 23 | description          |                      | administered                                           |       |
| 24 |                      |                      |                                                        |       |
| 25 |                      |                      |                                                        |       |
| 26 |                      |                      |                                                        |       |
| 27 |                      |                      |                                                        |       |
| 28 |                      |                      |                                                        |       |
| 29 | Interventions:       | <a href="#">#11b</a> | Criteria for discontinuing or modifying allocated      | 14-18 |
| 30 |                      |                      | interventions for a given trial participant (eg, drug  |       |
| 31 | modifications        |                      | dose change in response to harms, participant          |       |
| 32 |                      |                      | request, or improving / worsening disease)             |       |
| 33 |                      |                      |                                                        |       |
| 34 |                      |                      |                                                        |       |
| 35 |                      |                      |                                                        |       |
| 36 |                      |                      |                                                        |       |
| 37 |                      |                      |                                                        |       |
| 38 |                      |                      |                                                        |       |
| 39 | Interventions:       | <a href="#">#11c</a> | Strategies to improve adherence to intervention        | 14-18 |
| 40 |                      |                      | protocols, and any procedures for monitoring           |       |
| 41 | adherence            |                      | adherence (eg, drug tablet return; laboratory tests)   |       |
| 42 |                      |                      |                                                        |       |
| 43 |                      |                      |                                                        |       |
| 44 |                      |                      |                                                        |       |
| 45 |                      |                      |                                                        |       |
| 46 | Interventions:       | <a href="#">#11d</a> | Relevant concomitant care and interventions that are   | 14-18 |
| 47 |                      |                      | permitted or prohibited during the trial               |       |
| 48 | concomitant care     |                      |                                                        |       |
| 49 |                      |                      |                                                        |       |
| 50 |                      |                      |                                                        |       |
| 51 | Outcomes             | <a href="#">#12</a>  | Primary, secondary, and other outcomes, including      | 18-19 |
| 52 |                      |                      | the specific measurement variable (eg, systolic blood  |       |
| 53 |                      |                      | pressure), analysis metric (eg, change from baseline,  |       |
| 54 |                      |                      |                                                        |       |
| 55 |                      |                      |                                                        |       |
| 56 |                      |                      |                                                        |       |
| 57 |                      |                      |                                                        |       |
| 58 |                      |                      |                                                        |       |
| 59 |                      |                      |                                                        |       |
| 60 |                      |                      |                                                        |       |

1 final value, time to event), method of aggregation  
 2  
 3 (eg, median, proportion), and time point for each  
 4  
 5 outcome. Explanation of the clinical relevance of  
 6  
 7 chosen efficacy and harm outcomes is strongly  
 8  
 9 recommended  
 10

11  
 12  
 13 Participant timeline [#13](#) Time schedule of enrolment, interventions (including Figure 3  
 14  
 15 any run-ins and washouts), assessments, and visits  
 16  
 17 for participants. A schematic diagram is highly  
 18  
 19 recommended (see Figure)  
 20

21  
 22 Sample size [#14](#) Estimated number of participants needed to achieve 10-11  
 23  
 24 study objectives and how it was determined,  
 25  
 26 including clinical and statistical assumptions  
 27  
 28 supporting any sample size calculations  
 29  
 30

31  
 32 Recruitment [#15](#) Strategies for achieving adequate participant 24  
 33  
 34 enrolment to reach target sample size  
 35  
 36

### 37 Methods:

#### 38 Assignment of 39 40 interventions (for 41 42 controlled trials) 43 44

45  
 46  
 47 Allocation: sequence [#16a](#) Method of generating the allocation sequence (eg, 13  
 48  
 49 generation computer-generated random numbers), and list of  
 50  
 51 any factors for stratification. To reduce predictability  
 52  
 53 of a random sequence, details of any planned  
 54  
 55 restriction (eg, blocking) should be provided in a  
 56  
 57  
 58  
 59  
 60

|    |                        |                                                                            |        |
|----|------------------------|----------------------------------------------------------------------------|--------|
| 1  |                        | separate document that is unavailable to those who                         |        |
| 2  |                        |                                                                            |        |
| 3  |                        | enrol participants or assign interventions                                 |        |
| 4  |                        |                                                                            |        |
| 5  |                        |                                                                            |        |
| 6  | Allocation             | <a href="#">#16b</a> Mechanism of implementing the allocation sequence     | 13     |
| 7  |                        |                                                                            |        |
| 8  | concealment            | (eg, central telephone; sequentially numbered,                             |        |
| 9  |                        |                                                                            |        |
| 10 | mechanism              | opaque, sealed envelopes), describing any steps to                         |        |
| 11 |                        | conceal the sequence until interventions are                               |        |
| 12 |                        |                                                                            |        |
| 13 |                        | assigned                                                                   |        |
| 14 |                        |                                                                            |        |
| 15 |                        |                                                                            |        |
| 16 |                        |                                                                            |        |
| 17 |                        |                                                                            |        |
| 18 | Allocation:            | <a href="#">#16c</a> Who will generate the allocation sequence, who will   | 13     |
| 19 |                        |                                                                            |        |
| 20 | implementation         | enrol participants, and who will assign participants to                    |        |
| 21 |                        | interventions                                                              |        |
| 22 |                        |                                                                            |        |
| 23 |                        |                                                                            |        |
| 24 |                        |                                                                            |        |
| 25 | Blinding (masking)     | <a href="#">#17a</a> Who will be blinded after assignment to interventions | 14-15; |
| 26 |                        |                                                                            |        |
| 27 |                        | (eg, trial participants, care providers, outcome                           |        |
| 28 |                        |                                                                            | 18-19  |
| 29 |                        | assessors, data analysts), and how                                         |        |
| 30 |                        |                                                                            |        |
| 31 |                        |                                                                            |        |
| 32 |                        |                                                                            |        |
| 33 | Blinding (masking):    | <a href="#">#17b</a> If blinded, circumstances under which unblinding is   | NA     |
| 34 |                        |                                                                            |        |
| 35 | emergency              | permissible, and procedure for revealing a                                 |        |
| 36 |                        |                                                                            |        |
| 37 | unblinding             | participant's allocated intervention during the trial                      |        |
| 38 |                        |                                                                            |        |
| 39 |                        |                                                                            |        |
| 40 |                        |                                                                            |        |
| 41 | <b>Methods: Data</b>   |                                                                            |        |
| 42 |                        |                                                                            |        |
| 43 | <b>collection,</b>     |                                                                            |        |
| 44 |                        |                                                                            |        |
| 45 | <b>management, and</b> |                                                                            |        |
| 46 |                        |                                                                            |        |
| 47 | <b>analysis</b>        |                                                                            |        |
| 48 |                        |                                                                            |        |
| 49 |                        |                                                                            |        |
| 50 |                        |                                                                            |        |
| 51 | Data collection plan   | <a href="#">#18a</a> Plans for assessment and collection of outcome,       | 18-19  |
| 52 |                        |                                                                            |        |
| 53 |                        | baseline, and other trial data, including any related                      |        |
| 54 |                        |                                                                            |        |
| 55 |                        | processes to promote data quality (eg, duplicate                           |        |
| 56 |                        |                                                                            |        |
| 57 |                        | measurements, training of assessors) and a                                 |        |
| 58 |                        |                                                                            |        |
| 59 |                        |                                                                            |        |
| 60 |                        |                                                                            |        |

|    |                        |                                                                             |       |
|----|------------------------|-----------------------------------------------------------------------------|-------|
| 1  |                        | description of study instruments (eg, questionnaires,                       |       |
| 2  |                        | laboratory tests) along with their reliability and                          |       |
| 3  |                        | validity, if known. Reference to where data collection                      |       |
| 4  |                        | forms can be found, if not in the protocol                                  |       |
| 5  |                        |                                                                             |       |
| 6  |                        |                                                                             |       |
| 7  |                        |                                                                             |       |
| 8  |                        |                                                                             |       |
| 9  |                        |                                                                             |       |
| 10 | Data collection plan:  | <a href="#">#18b</a> Plans to promote participant retention and complete    | 24    |
| 11 | retention              | follow-up, including list of any outcome data to be                         |       |
| 12 |                        | collected for participants who discontinue or deviate                       |       |
| 13 |                        | from intervention protocols                                                 |       |
| 14 |                        |                                                                             |       |
| 15 |                        |                                                                             |       |
| 16 |                        |                                                                             |       |
| 17 |                        |                                                                             |       |
| 18 |                        |                                                                             |       |
| 19 |                        |                                                                             |       |
| 20 | Data management        | <a href="#">#19</a> Plans for data entry, coding, security, and storage,    | 24-25 |
| 21 |                        | including any related processes to promote data                             |       |
| 22 |                        | quality (eg, double data entry; range checks for data                       |       |
| 23 |                        | values). Reference to where details of data                                 |       |
| 24 |                        | management procedures can be found, if not in the                           |       |
| 25 |                        | protocol                                                                    |       |
| 26 |                        |                                                                             |       |
| 27 |                        |                                                                             |       |
| 28 |                        |                                                                             |       |
| 29 |                        |                                                                             |       |
| 30 |                        |                                                                             |       |
| 31 |                        |                                                                             |       |
| 32 |                        |                                                                             |       |
| 33 |                        |                                                                             |       |
| 34 | Statistics: outcomes   | <a href="#">#20a</a> Statistical methods for analysing primary and          | 23-24 |
| 35 |                        | secondary outcomes. Reference to where other                                |       |
| 36 |                        | details of the statistical analysis plan can be found, if                   |       |
| 37 |                        | not in the protocol                                                         |       |
| 38 |                        |                                                                             |       |
| 39 |                        |                                                                             |       |
| 40 |                        |                                                                             |       |
| 41 |                        |                                                                             |       |
| 42 |                        |                                                                             |       |
| 43 |                        |                                                                             |       |
| 44 | Statistics: additional | <a href="#">#20b</a> Methods for any additional analyses (eg, subgroup      | 23-24 |
| 45 | analyses               | and adjusted analyses)                                                      |       |
| 46 |                        |                                                                             |       |
| 47 |                        |                                                                             |       |
| 48 |                        |                                                                             |       |
| 49 |                        |                                                                             |       |
| 50 | Statistics: analysis   | <a href="#">#20c</a> Definition of analysis population relating to protocol | 23-24 |
| 51 | population and         | non-adherence (eg, as randomised analysis), and                             |       |
| 52 | missing data           | any statistical methods to handle missing data (eg,                         |       |
| 53 |                        | multiple imputation)                                                        |       |
| 54 |                        |                                                                             |       |
| 55 |                        |                                                                             |       |
| 56 |                        |                                                                             |       |
| 57 |                        |                                                                             |       |
| 58 |                        |                                                                             |       |
| 59 |                        |                                                                             |       |
| 60 |                        |                                                                             |       |

1 **Methods: Monitoring**

2

3

4 Data monitoring: [#21a](#) Composition of data monitoring committee (DMC); NA

5

6 formal committee

7 summary of its role and reporting structure;

8

9 statement of whether it is independent from the

10

11 sponsor and competing interests; and reference to

12

13 where further details about its charter can be found, if

14

15

16 not in the protocol. Alternatively, an explanation of

17

18 why a DMC is not needed

19

20

21 Data monitoring: [#21b](#) Description of any interim analyses and stopping NA

22

23 interim analysis

24 guidelines, including who will have access to these

25

26 interim results and make the final decision to

27

28 terminate the trial

29

30

31 Harms [#22](#) Plans for collecting, assessing, reporting, and NA

32

33 managing solicited and spontaneously reported

34

35 adverse events and other unintended effects of trial

36

37 interventions or trial conduct

38

39

40

41 Auditing [#23](#) Frequency and procedures for auditing trial conduct, NA

42

43 if any, and whether the process will be independent

44

45 from investigators and the sponsor

46

47

48 **Ethics and**

49

50 **dissemination**

51

52

53

54 Research ethics [#24](#) Plans for seeking research ethics committee / 24-25

55

56 approval

57 institutional review board (REC / IRB) approval

58

59

60

|    |                    |                      |                                                         |       |
|----|--------------------|----------------------|---------------------------------------------------------|-------|
| 1  | Protocol           | <a href="#">#25</a>  | Plans for communicating important protocol              | 24-25 |
| 2  |                    |                      |                                                         |       |
| 3  | amendments         |                      | modifications (eg, changes to eligibility criteria,     |       |
| 4  |                    |                      | outcomes, analyses) to relevant parties (eg,            |       |
| 5  |                    |                      | investigators, REC / IRBs, trial participants, trial    |       |
| 6  |                    |                      | registries, journals, regulators)                       |       |
| 7  |                    |                      |                                                         |       |
| 8  |                    |                      |                                                         |       |
| 9  |                    |                      |                                                         |       |
| 10 |                    |                      |                                                         |       |
| 11 |                    |                      |                                                         |       |
| 12 |                    |                      |                                                         |       |
| 13 | Consent or assent  | <a href="#">#26a</a> | Who will obtain informed consent or assent from         | 24-25 |
| 14 |                    |                      | potential trial participants or authorised surrogates,  |       |
| 15 |                    |                      | and how (see Item 32)                                   |       |
| 16 |                    |                      |                                                         |       |
| 17 |                    |                      |                                                         |       |
| 18 |                    |                      |                                                         |       |
| 19 |                    |                      |                                                         |       |
| 20 |                    |                      |                                                         |       |
| 21 | Consent or assent: | <a href="#">#26b</a> | Additional consent provisions for collection and use    | 24-25 |
| 22 | ancillary studies  |                      | of participant data and biological specimens in         |       |
| 23 |                    |                      | ancillary studies, if applicable                        |       |
| 24 |                    |                      |                                                         |       |
| 25 |                    |                      |                                                         |       |
| 26 |                    |                      |                                                         |       |
| 27 |                    |                      |                                                         |       |
| 28 |                    |                      |                                                         |       |
| 29 | Confidentiality    | <a href="#">#27</a>  | How personal information about potential and            | 24-25 |
| 30 |                    |                      | enrolled participants will be collected, shared, and    |       |
| 31 |                    |                      | maintained in order to protect confidentiality before,  |       |
| 32 |                    |                      | during, and after the trial                             |       |
| 33 |                    |                      |                                                         |       |
| 34 |                    |                      |                                                         |       |
| 35 |                    |                      |                                                         |       |
| 36 |                    |                      |                                                         |       |
| 37 |                    |                      |                                                         |       |
| 38 |                    |                      |                                                         |       |
| 39 | Declaration of     | <a href="#">#28</a>  | Financial and other competing interests for principal   | 26    |
| 40 | interests          |                      | investigators for the overall trial and each study site |       |
| 41 |                    |                      |                                                         |       |
| 42 |                    |                      |                                                         |       |
| 43 |                    |                      |                                                         |       |
| 44 | Data access        | <a href="#">#29</a>  | Statement of who will have access to the final trial    | 24-25 |
| 45 |                    |                      | dataset, and disclosure of contractual agreements       |       |
| 46 |                    |                      | that limit such access for investigators                |       |
| 47 |                    |                      |                                                         |       |
| 48 |                    |                      |                                                         |       |
| 49 |                    |                      |                                                         |       |
| 50 |                    |                      |                                                         |       |
| 51 | Ancillary and post | <a href="#">#30</a>  | Provisions, if any, for ancillary and post-trial care,  | NA    |
| 52 | trial care         |                      | and for compensation to those who suffer harm from      |       |
| 53 |                    |                      | trial participation                                     |       |
| 54 |                    |                      |                                                         |       |
| 55 |                    |                      |                                                         |       |
| 56 |                    |                      |                                                         |       |
| 57 |                    |                      |                                                         |       |
| 58 |                    |                      |                                                         |       |
| 59 |                    |                      |                                                         |       |
| 60 |                    |                      |                                                         |       |

|    |                       |                      |                                                          |               |
|----|-----------------------|----------------------|----------------------------------------------------------|---------------|
| 1  | Dissemination         | <a href="#">#31a</a> | Plans for investigators and sponsor to communicate       | 24-25         |
| 2  |                       |                      |                                                          |               |
| 3  | policy: trial results |                      | trial results to participants, healthcare professionals, |               |
| 4  |                       |                      | the public, and other relevant groups (eg, via           |               |
| 5  |                       |                      | publication, reporting in results databases, or other    |               |
| 6  |                       |                      | data sharing arrangements), including any                |               |
| 7  |                       |                      | publication restrictions                                 |               |
| 8  |                       |                      |                                                          |               |
| 9  |                       |                      |                                                          |               |
| 10 |                       |                      |                                                          |               |
| 11 |                       |                      |                                                          |               |
| 12 |                       |                      |                                                          |               |
| 13 |                       |                      |                                                          |               |
| 14 |                       |                      |                                                          |               |
| 15 | Dissemination         | <a href="#">#31b</a> | Authorship eligibility guidelines and any intended use   | 24-26         |
| 16 |                       |                      |                                                          |               |
| 17 | policy: authorship    |                      | of professional writers                                  |               |
| 18 |                       |                      |                                                          |               |
| 19 |                       |                      |                                                          |               |
| 20 |                       |                      |                                                          |               |
| 21 | Dissemination         | <a href="#">#31c</a> | Plans, if any, for granting public access to the full    | 24-25         |
| 22 |                       |                      |                                                          |               |
| 23 | policy: reproducible  |                      | protocol, participant-level dataset, and statistical     |               |
| 24 |                       |                      | code                                                     |               |
| 25 | research              |                      |                                                          |               |
| 26 |                       |                      |                                                          |               |
| 27 |                       |                      |                                                          |               |
| 28 |                       |                      |                                                          |               |
| 29 | <b>Appendices</b>     |                      |                                                          |               |
| 30 |                       |                      |                                                          |               |
| 31 |                       |                      |                                                          |               |
| 32 | Informed consent      | <a href="#">#32</a>  | Model consent form and other related documentation       | Supplementary |
| 33 |                       |                      |                                                          |               |
| 34 | materials             |                      | given to participants and authorised surrogates          | section       |
| 35 |                       |                      |                                                          |               |
| 36 |                       |                      |                                                          |               |
| 37 |                       |                      |                                                          | Table S1      |
| 38 |                       |                      |                                                          |               |
| 39 |                       |                      |                                                          |               |
| 40 | Biological            | <a href="#">#33</a>  | Plans for collection, laboratory evaluation, and         | NA            |
| 41 |                       |                      |                                                          |               |
| 42 | specimens             |                      | storage of biological specimens for genetic or           |               |
| 43 |                       |                      | molecular analysis in the current trial and for future   |               |
| 44 |                       |                      | use in ancillary studies, if applicable                  |               |
| 45 |                       |                      |                                                          |               |
| 46 |                       |                      |                                                          |               |
| 47 |                       |                      |                                                          |               |
| 48 |                       |                      |                                                          |               |
| 49 |                       |                      |                                                          |               |

50 None The SPIRIT checklist is distributed under the terms of the Creative Commons Attribution  
 51 License CC-BY-ND 3.0. This checklist can be completed online using <https://www.goodreports.org/>, a  
 52 tool made by the [EQUATOR Network](#) in collaboration with [Penelope.ai](#)  
 53  
 54  
 55  
 56  
 57  
 58  
 59
